# RNA localization to the mitotic spindle is essential for early development and is regulated by kinesin-1 and dynein

Carolyn M. Remsburg, Kalin D. Konrad, Jia L. Song<sup>\*</sup>

University of Delaware, Department of Biological Sciences, Newark, DE, USA

<sup>\*</sup>Corresponding author

University of Delaware

Department of Biological Sciences, 323 Wolf Hall, Newark, DE 19716, USA

Email: jsong@udel.edu

Telephone: 001-302-831-2794

Key words: mitosis, RNA localization, kinesin-1, dynein, embryonic development

## Summary Statement:

Transcripts of genes regulating mitosis localize to the spindle. This localization is dependent on microtubules, kinesin-1 and dynein. In the case of *Aurora B*, is dependent upon its 3'UTR and is essential for embryonic development.

## Abstract

Mitosis is a fundamental and highly regulated process that acts to faithfully segregate chromosomes into two identical daughter cells. Transcript localization of genes involved in mitosis to the mitotic spindle may be an evolutionarily conserved mechanism to ensure that mitosis occurs in a timely manner. We

identified many RNA transcripts that encode proteins involved in mitosis localized at the mitotic spindles in dividing sea urchin embryos and mammalian cells. Disruption of microtubule polymerization, kinesin-1, or dynein results in lack of spindle localization of these transcripts in the sea urchin embryo. Further, results indicate that the cytoplasmic polyadenylation element (CPE) within the 3'UTR of *Aurora B*, a recognition sequence of CPEB, is essential for RNA localization to the mitotic spindle. Blocking this sequence results in arrested development during early cleavage stages, suggesting that RNA localization to the mitotic spindle may be a regulatory mechanism of cell division that is important for early development.

## Introduction

Mitosis is the fundamental cellular process in which a cell divides to become two identical daughter cells following replication of its DNA (Mcintosh, 2016). This process involves the division of its duplicated DNA in karyokinesis and separation of the cytoplasm in cytokinesis (Mcintosh, 2016). The mitotic spindle is the organelle that drives the segregation of chromosomes (Gadde and Heald, 2004). The spindle is comprised primarily of tubulin monomers that heterodimerize (Petry, 2016). These monomers polymerize through the action of enzyme such as XMAP215, which is essential for the formation of mitotic spindles (Kronja *et al.*, 2009). Actin also regulates mitosis by generating force within the dividing cell to orient the mitotic spindle, as well as separating chromosomes during anaphase (Anstrom, 1992; Kunda and Baum, 2009). Myosin II is the major motor protein that associates with actin and is indispensable for cytokinesis (Chaigne *et al.*, 2016; Babkoff *et al.*, 2021). Other actin regulators are essential for mitosis, such as cofilin, an actin depolymerizer, whose inactivation is necessary for proper spindle orientation during mitosis and is also responsible for importing actin into the nucleus (Pendleton *et al.*, 2003;

Kaji, Muramoto and Mizuno, 2008). Actin export from the nucleus is partially controlled through its interaction with profilin, which is also required for cytokinesis in chondrocytes (Stüven, Hartmann and Görlich, 2003; Böttcher *et al.*, 2009).

The segregation of chromosomes is highly dynamic and microtubule motors, such as kinesin-5, are required to slide anti-parallel microtubule fibers polewards (Cochran *et al.*, 2005; Mann and Wadsworth, 2019). CENP-E, centromeric protein E, is a plus-ended kinesin motor protein that assists in orienting chromosomes properly along the metaphase plate (Craske and Welburn, 2020). Conversely, dynein is a microtubule minus-end directed motor protein that is known to regulate several aspects of mitosis, from centrosome separation to chromosome congression to spindle formation (Raaijmakers and Medema, 2014). Additionally, dynein and dynactin interact with NuMA to tether the astral microtubules to the cell cortex to orient the mitotic spindle (Hueschen *et al.*, 2017; Okumura *et al.*, 2018). NuMA also is essential for formation and maintenance of the spindle poles during mitosis (Zeng, 2000).

During early development, metazoan embryos undergo several rounds of rapid early cleavage divisions, where they cycle between mitosis (M) and synthesis (S) phases of the cell cycle, with minimal gap phases (Ikegami *et al.*, 1994; Siefert, Clowdus and Sansam, 2015). Diverse cells accomplish mitosis in a relatively constant time frame of between 30 to 60 min, indicating exquisite regulation of mitosis to ensure a timely completion of this process (Araujo *et al.*, 2016). Prolonged mitosis has been shown to result in cell death, cell arrest, or DNA damage (Rieder and Palazzo, 1992; Lanni and Jacks, 1998; Quignon *et al.*, 2007; Uetake and Sluder, 2010; Orth *et al.*, 2012). Thus, it is not surprising that mitosis is regulated by a plethora of mechanisms, from transcriptional regulation of cell cycle factors (Spellman *et al.*, 1998; Whitfield *et al.*, 2002) to post-translational regulation by phosphorylation and ubiquitination (Stegmeier *et*

*al.*, 2007; Dephoure *et al.*, 2008; Lindqvist, Rodríguez-Bravo and Medema, 2009). In general, transcription is globally inhibited during mitosis (Martínez-Balbás *et al.*, 1995); however, transcription occurs at the centromeric regions. Centromere transcription is essential for CENP-A nucleosome assembly and centromere formation and maintenance (Perea-Resa and Blower, 2018). Transcribed centromeric RNAs ensure correct CENP-C (RNA binding protein) levels and CENP-P (nucleosome) loading and accurate chromosome segregation. siRNAs and lncRNAs have also been found to be derived from centromeric regions and may play an important role in maintaining heterochromatin in the centromere domains (Hall *et al.*, 2002; Volpe *et al.*, 2002; Liu *et al.*, 2015; Johnson *et al.*, 2017; Perea-Resa and Blower, 2018). As mitosis is under strict temporal control, it must be regulated in a rapid manner. As transcriptional regulation takes time, post-transcriptional and post-translational regulation play a key role during mitosis (Li and Zhang, 2017; Moura and Conde, 2019). Several critical steps in the cell cycle and specifically mitosis require post-translational regulation by kinases and phosphatases (Dephoure *et al.*, 2008; Lindqvist, Rodríguez-Bravo and Medema, 2009; Combes *et al.*, 2017; Gelens and Saurin, 2018; Moura and Conde, 2019). For example, entry into mitosis requires mitotic kinases Cdk1/Cyclin B1 and phosphatase Cdc25 (Boutros, Dozier and Ducommun, 2006; Lindqvist, Rodríguez-Bravo and Medema, 2009; Vigneron *et al.*, 2018; Sun *et al.*, 2019). Translation of cyclin B is required for sea urchin embryos to undergo mitosis (Chassé *et al.*, 2016). Mitotic spindle elongation requires a perfect balance between kinase and phosphatase activities (Winey and Bloom, 2012; Nilsson, 2019). During metaphase, proper bipolar chromosome attachment is essential for progression through the spindle assembly checkpoint (SAC), which is passed partially through the inactivation of CDK1/Cyclin B and the activation of the anaphase-promoting complex/cyclosome (APC/C) via phosphorylation (Castro

*et al.*, 2005). In addition, phosphatases regulate APC/C activity by directly dephosphorylating Cdc20 and APC/C subunits and indirectly through phosphatase-mediated silencing of checkpoint signaling from the kinetochores to promote mitotic exit (Labit *et al.*, 2012; Craney *et al.*, 2016; Hein *et al.*, 2017; Lee *et al.*, 2017). Aurora B kinase plays a role in sensing improperly attached chromosomes and phosphorylating kinetochore components Ndc80, KNL-1 and Dsn1/KNL-3 to reduce microtubule affinity and promote detachment from the kinetochore (Lens *et al.*, 2003; Welburn *et al.*, 2010). Aurora B kinase's phosphorylation of Ndc80 also recruits Mps1, activating the SAC in the presence of microtubule-unattached chromosomes (Cheeseman *et al.*, 2002, 2006; Combes *et al.*, 2017). Thus, the coordinated regulation of hundreds of proteins by dynamic phosphorylation during mitosis is a key mechanism to ensure the timely and precise segregation of chromosomes.

While post-translational regulation of mitosis by kinases and phosphatases has been well-studied (Dephoure *et al.*, 2008; Lindqvist, Rodríguez-Bravo and Medema, 2009; Combes *et al.*, 2017; Moura and Conde, 2019), post-transcriptional regulation through localization of important RNA transcripts is less well understood. Several different proteins have been identified to control localization of RNAs to the mitotic spindle. Aurora B protein is recruited to the different areas of the kinetochores by phosphorylated histones where it has been found to associate with hundreds of mRNAs that are enriched on mitotic spindles, many of which encode cytoskeletal proteins and transcription factors (Jambhekar *et al.*, 2014). The binding of Aurora B to mRNA is essential for its localization to centromeres, as well as its ability to phosphorylate its substrates, including Polo kinase, p53, securin, and APC/C, to initiate anaphase (Jambhekar *et al.*, 2014). Staufen, an RNA binding protein, is thought to mediate localization of subpopulations of RNAs to the spindles during mitosis (Hassine *et al.*, 2020). Additionally, Staufen regulates localization of *prospero* in *Drosophila* neuroblasts,

ensuring asymmetric division and correct cell fate after mitosis (Broadus, Fuerstenberg and Doe, 1998). *Cyclin B* mRNA has previously been shown to have mitotic spindle localization in *Xenopus* and *Strongylocentrotus purpuratus*, as well as perinuclear localization in *Drosophila* embryos (Raff, Whitfield and Glover, 1990; Groisman *et al.*, 2000; Yajima and Wessel, 2015). Interestingly, disruption of *Cyclin B* RNA localization results in defects in spindle architecture and ultimately abnormal cell division (Groisman *et al.*, 2000). Many RNAs have been identified to localize to the mitotic spindle through biochemical assays (Blower *et al.*, 2007; Sharp *et al.*, 2011; Pascual *et al.*, 2021) and several RNAs have been identified to localize to the centrosome, spindle midzone and microtubules in embryos (Kingsley *et al.*, 2007; Lécuyer *et al.*, 2007; Splinter *et al.*, 2010). However, the impact of disruption of this localization has not been characterized in a developing embryo. In this study, we test the hypothesis that transcripts encoding proteins that regulate mitotic processes localize to the mitotic spindle, and that this localization is essential for early embryonic development.

We use the purple sea urchin embryo, *S. purpuratus*, to study RNA localization during mitosis. The sea urchin produces large and optically transparent blastomeres during cleavage stage which enables easy visualization of perturbation phenotypes (McClay, 2011). Using the sea urchin embryo and mammalian cells, we identified several transcripts that encode proteins involved in mitosis located on the mitotic spindle, indicating that this RNA localization is evolutionarily conserved. Transcripts that we examined were selected for their known roles in regulating the progression of mitosis. Further, this localization is dependent on microtubules and microtubule motor proteins kinesin-1 and dynein. Using reporter constructs, we also demonstrated that the 3'UTR of *Aurora B* is sufficient for spindle localization. Importantly, we identified a cytoplasmic polyadenylation element (CPE) sequence that is required for localization of

*Aurora B* to the spindles and observed that blocking this CPE sequence results in developmental arrest. During cleavage stage development, the lack of gap phases during relatively rapid cell divisions may utilize spatial regulation of RNA transcripts of key players in mitosis to provide the cell another layer of control to an essential process. Our results reveal that RNA localization of *Aurora B* transcript to the spindles is a novel mechanism in ensuring proper development.

## Results

### RNA transcripts localize to the mitotic spindle.

We examined the subcellular localization of the transcripts encoding select proteins involved in mitosis (Fig. 1A). The RNA transcripts of *Cyclin B*, *APC*, *Cdk*, *Aurora B*, *Polo kinase*, *CENP-E*, are localized between the dividing chromosomes of sea urchin 16 to 32 cell cleavage stage embryos (Fig. 1A). At metaphase, *NuMA* is enriched at the spindle midzone (arrow) and at the presumed centrosome (arrowhead).

We also examined the subcellular localization of transcripts encoding cytoskeletal proteins, microtubule motor proteins, and regulators of other facets of mitosis (Fig. 1B). We observed that  $\beta$ -actin, *Myosin II*, *Tubulin  $\alpha$ 1*, *XMAP*, *Cofilin*, *Profilin*, *Dynein* and *Staufen* are localized between the dividing chromosomes of cleavage stage embryos (16 to 32 cells) undergoing mitosis (Fig. 1B). We also observe that the RNA transcripts of some of these genes (including *Aurora B*, *Polo kinase*,  $\beta$ -actin, *Tubulin  $\alpha$ 1*, *XMAP*, *Dynein*, and *Staufen*) localize to the perinuclear region in blastomeres in interphase (Fig. 1 and data not shown). Transcript localization does vary throughout the cell cycle, with *Aurora B*, *Polo kinase*, *Tubulin  $\alpha$ 1*, *Dynein*, and *Staufen* localizing to the midzone of the mitotic spindle during metaphase and anaphase, then becoming more diffuse during telophase (Fig. S2 depicts this for *Aurora B*). These data

indicate that the transcripts encoding proteins involved in mitosis are localized to the mitotic spindle.

To test the hypothesis that this localization of RNA transcripts to the mitotic spindle is selective and likely due to the function of these proteins in mitosis, we examined the subcellular localization of expressed transcripts that encode proteins of non-mitotic functions. *Eve* and *Tbr* are transcription factors that regulate endodermal and skeletal specification, respectively (Revilla-I-Domingo, Oliveri and Davidson, 2007; Peter and Davidson, 2010). *Drosha* is a dsRNA cleaving enzyme that processes microRNAs (Song *et al.*, 2012). *Tbr* and *Drosha* are maternally present, while *Eve* is expressed by 6 hpf (Song and Wessel, 2007; Arshinoff *et al.*, 2022). We observed that the RNA transcripts of *Eve*, *Tbr*, and *Drosha* are diffused throughout the cytoplasm of dividing cells (Fig. 1D). These data indicate that the localization of RNA transcripts to the mitotic spindle is not a general phenomenon that occurs with all RNA transcripts in the cell, but rather, a regulated process.

To examine this enrichment quantitatively, we measured the mean fluorescence intensity at the midzone of an anaphase blastomere and the cytoplasm and took the ratio of these measurements (Fig. 1E). A ratio of greater than 1 indicates more enrichment at the mitotic spindle midzone, since the fluorescence intensity is higher at the midzone, while a ratio of 1 indicates that the transcript is evenly dispersed throughout the blastomere. We observe that transcripts of genes involved in mitosis (Figs. 1A,C) have significantly more enrichment at the mitotic spindle, compared to transcripts of genes not involved in mitosis (Fig. 1D).

To test if this RNA localization is evolutionarily conserved in other organisms and cells, we examined subcellular localization of a select set of these transcripts in pig epithelial kidney cells (LLC-PK1) (Hull, Cherry and Weaver, 1976). We observed *Aurora B*, *Polo kinase 1* and *Staufen1* to localize between dividing nuclei in LLC-PK1 cells (Fig. 2). These data indicate that the



localization of RNA transcripts encoding proteins involved in mitosis is conserved from sea urchins to mammals.

**NuMA and  $\alpha$ -tubulin protein localize to the mitotic spindle in the region of their respective RNA transcripts.**

To determine if the encoded proteins of *NuMA* and *Tubulin  $\alpha$ 1* RNA transcripts are localized in similar regions of the blastomeres, we used immunolabeling to examine the subcellular localization of these proteins (Fig. 1B). Whereas we observe *NuMA* RNA localizes to the spindle midzone (arrows), as well as the region of the presumed centrosome (arrowhead), the NuMA protein localizes to the region of the spindle midzone, as well as the microtubules surrounding the presumed centrosome. For  $\alpha$ -tubulin, both RNA and protein localize to the mitotic spindle (Fig. 1B,C). These data support that the proteins encoded by *NuMA* and *Tubulin  $\alpha$ 1* RNA transcripts localize to a similar subcellular region.

**The localization of RNA transcripts to the mitotic spindle is not dependent upon actin dynamics.**

To understand how RNA transcripts are transported to the mitotic spindle, we used cytochalasin D (Lane *et al.*, 1993) to disrupt actin dynamics within the embryo, followed by examining the subcellular localization of specific transcripts. We found that the cytochalasin D resulted in an inability of the embryos to undergo cell division in a dose-dependent manner (Fig. S1A), as well as a decrease in the amount of F-actin (Fig. S1B). However, cytochalasin D disruption of actin dynamics did not result in a change in localization of *Aurora B*, *Dynein*, *Staufen* or *Tubulin  $\alpha$ 1* transcripts (Fig. 3A). We found no significant difference in the ratio of fluorescence at the spindle to the cytoplasm between embryos treated with DMSO and embryos treated with cytochalasin D (Fig. 3B).

This suggests that the transport of these RNA transcripts to the mitotic spindle is not dependent upon short-term (<30 minutes) disruption of actin dynamics. In order to prevent interference with cytokinesis, we did not treat embryos with cytochalasin D for longer than 30 minutes.

Additionally, we observed no significant difference in transcript level between embryos treated with DMSO and embryos treated with cytochalasin D, using real time, quantitative PCR (qPCR) (Fig. 3C).

### **Inhibition of microtubule polymerization disrupts localization of select RNA transcripts to the mitotic spindle.**

To test if localization of RNA transcripts to the mitotic spindle is dependent upon intact microtubule fibers, we used colchicine to inhibit microtubule polymerization (Rieder and Palazzo, 1992), followed by detection of the subcellular localization of specific RNA transcripts. Colchicine disrupts formation of the mitotic spindle (as observed by the immunolabeling of tubulin), as well as resulting in a more diffuse distribution of *Aurora B*, *Dynein*, *Polo kinase* and *Tubulin  $\alpha 1$*  transcripts compared to embryos treated with DMSO (Fig. 4). Treatment with colchicine results in a significantly lower ratio of fluorescence at the spindle compared to the cytoplasm in embryos treated with colchicine compared to control embryos (Fig. 4B), indicating that microtubule polymerization is required for localization of these RNA transcripts to the mitotic spindle. While the subcellular localization of these transcripts was altered, we observed no significant difference in transcript level in control embryos compared to embryos treated with colchicine, using qPCR (Fig. 4C).

### **Preventing kinesin-1 from interacting with its cargo results in reduced localization of RNA transcripts to the mitotic spindles.**

Since our data suggest that RNAs are transported to the mitotic spindle along microtubule fibers, and typically RNAs are transported subcellularly by interacting with microtubule motors (Tekotte and Davis, 2002; Suter, 2018), we investigate the role of microtubule motors in localizing RNA transcripts to the mitotic spindle. Kinesin-1 is a conserved motor protein that is known to transport vesicles, organelles and ribonucleic proteins (RNP) complexes along microtubules (Hirokawa *et al.*, 2009). Kinesin-1 has been identified to regulate the localization of RNA transcripts in *Drosophila* oogenesis, neurons and cardiomyocytes (Dimitrova-Paternoga *et al.*, 2021; Fukuda *et al.*, 2021; Scarborough *et al.*, 2021). We used kinesore, a drug which binds to kinesin-1 at the cargo site and activates kinesin 1's ability to bind to microtubules (Randall *et al.*, 2017). RNA localization to the mitotic spindles in embryos treated with kinesore is significantly reduced compared to embryos treated with DMSO (Fig. 5A,B), as indicated by a statistically significant reduction of the ratio of mean fluorescence intensity at the mitotic spindle to the mean fluorescence intensity in the cytoplasm (Fig. 5B). This suggests that these RNAs are in part transported to the mitotic spindle by kinesin-1. We found that the total level of these transcripts was not significantly different in embryos with kinesore compared to embryos treated with DMSO (Fig. 5C).

### **Preventing dynein from transporting its cargo along microtubules alters localization of RNA transcripts at the mitotic spindle**

As kinesin-1 is a plus-ended motor (Hirokawa *et al.*, 2009), we also wanted to examine dynein, a minus-ended motor that has been identified to transport RNA transcripts in *Drosophila* oogenesis and neurons (Schnorrer, Bohmann and Nusslein-Volhard, 2000; Xu, Brechbiel and Gavis, 2013; Herbert

*et al.*, 2017). We used ciliobrevin D to inhibit dynein from transporting its cargo along the microtubule filaments (Firestone *et al.*, 2012). As has been reported previously, we observe smaller and more compact mitotic spindles in ciliobrevin-treated embryos compared to DMSO treated embryos (Fig. 6A, tubulin immunolabeling) (Firestone *et al.*, 2012).

In control embryos, RNA transcripts are enriched at the midzone of the mitotic spindle, while in ciliobrevin D treated embryos, the RNA transcripts are enriched at the plus ends of the astral microtubule filaments (Fig. 6A). The ratio of fluorescence at the spindle compared to the cytoplasm is significantly decreased in embryos treated with ciliobrevin D compared to embryos treated with DMSO, indicating that transport of the RNA transcripts to the spindle is dependent on dynein (Fig. 6B). Despite changes of *Staufen*'s subcellular localization, we observe no change in the level of *Staufen* in embryos treated with ciliobrevin D compared to control embryos, using qPCR (Fig. 6C).

### **The CPE within the 3'UTR of *Aurora B* is necessary for the localization of *Aurora B* RNA transcript to the mitotic spindle and critical for early development**

In order to understand how RNA transcripts are localized to the mitotic spindle, we investigated which region of the transcript is necessary for localization. We cloned the 3'UTR of *Aurora B* downstream of *Renilla* luciferase (*Rluc*) construct (*Aurora B-Rluc*) and tested its localization within the dividing embryo (Fig. 7A,B). Results indicate that the 3'UTR is necessary and sufficient to localize *AuroraB-RLuc* to the mitotic spindles, while *Rluc* transcript by itself does not localize to the mitotic spindles (Fig. 7A,B). We bioinformatically identified a potential CPE within its 3'UTR. To test if the CPE within *Aurora B* is critical for its localization to the mitotic spindles, we deleted the CPE in the *Aurora B* 3'UTR downstream of *RLuc* (Fig. 7A,B). Results indicate that deletion of the CPE

abrogates localization of the *AuroraB-RLuc* transcript at the mitotic spindles (Fig. 7A).

To test if localization of *Aurora B* RNA to the mitotic spindle has an impact on embryonic development, we designed a synthetic morpholino antisense oligonucleotide complementary to the CPE to block potential binding of CPEB to the endogenous CPE within the *Aurora B* 3'UTR (Fig. 7B). Results indicate that blocking the CPE significantly reduces localization of endogenous *Aurora B* RNA to the mitotic spindles (Fig. 7C), as the ratio of fluorescence at the spindle compared to the cytoplasm is significantly decreased in embryos in which the CPE is blocked compared to control embryos (Fig. 7C).

Importantly, blocking the *Aurora B* CPE results in early developmental defects. This is evident that as early as 2 hpf, 61% of embryos injected with the control oligo have divided to 2 cells, whereas only 19% of embryos injected with CPE blocking oligo have divided to 2 cells (Fig. 7D). This trend persists throughout the early cleavage stages to 6 hpf, where 64.7% of embryos injected with the control oligo have reached the 16-32 cell stage, compared to 24.8% of the embryos injected with CPE blocking oligo have reached the same developmental stage (Fig. 7D). There is no significant difference between embryos injected with the negative control oligo, which does not recognize specific sequences within the sea urchin genome, and the *Aurora B* control oligo, which is complementary to the *Aurora B* 3'UTR sequence upstream of the CPE. Of note is that at 24 hpf, only 50% of the embryos injected with CPE blocking oligo have developed into blastulae, compared to 85% of injected control embryos (Fig S2). Taken together, since 50% of CPE blocking oligo-injected embryos do not survive to 24 hpf, mislocalization of *Aurora B* transcript likely lead to developmental arrest or lethality. Thus, these data indicate that localization of *Aurora B* transcript to the mitotic spindle is important for early development.

## Discussion

During early development, cells go through rapid cycles of mitosis, without intervening gap phases, making regulation of mitosis critical during this time (Siefert, Clowdus and Sansam, 2015). We identified RNA localization as a potential regulatory mechanism that regulates the relatively fast cell divisions during the cleavage stage embryos. Biochemical assays have identified transcripts that regulate cell cycle, cell division and chromosome function to be enriched in the subset of transcripts associated with mitotic spindles (Sharp *et al.*, 2011). These assays were performed in *Xenopus* egg extract in which mitotic spindle formation was induced. To date, only a select few transcripts, such as *cyclin B* and *vasa*, have been visualized at the mitotic spindle in developing embryos (Groisman *et al.*, 2000; Sharp *et al.*, 2011; Yajima and Wessel, 2015; Takahashi, Ishii and Yamashita, 2018; Waldron and Yajima, 2020; Fernandez-Nicolas *et al.*, 2022).

We observed that transcripts encoding proteins involved in mitosis localize to the spindles (Fig. 1A,C), while transcripts encoding proteins that do not regulate mitosis do not show that localization (Fig. 1D). Additionally, we observe that the proteins encoded by two of these transcripts, NuMA and tubulin  $\alpha 1$ , also localize to a similar region (Fig. 1B). Prior research has indicated that localization of the RNA correlates with the site where the encoded protein functions (Mowry and Melton, 1992; Kloc and Etkin, 1994; Höfer, Ness and Drenckhahn, 1997; Joseph and Melton, 1998; Farina *et al.*, 2003). For example, *Vg1* mRNA and protein localizing to the vegetal pole of the *Xenopus* oocyte, where the localization of *Vg1* mRNA is known to be important for inducing endoderm and mesoderm in developing *Xenopus* embryos (Mowry and Melton, 1992; Kloc and Etkin, 1994; Joseph and Melton, 1998). Another example is that disruption of  $\beta$ -actin mRNA and protein localization to lamellipodia in chicken fibroblasts alters the

polarization and migration of the cell (Höfer, Ness and Drenckhahn, 1997; Shestakova, Singer and Condeelis, 2001; Farina *et al.*, 2003). In addition, intracellular RNA localization has been well studied in the context of neurons (Mayford *et al.*, 1996; Huang *et al.*, 2003; Dahm, Kiebler and Macchi, 2007; Yoon *et al.*, 2016, and many others). Neurons can have extremely long axons, and contain distinct intracellular regions, such as dendrites and synaptic boutons that have markedly different local environments (Li, Yu and Ji, 2021). The different local environments within different parts of a neuron are partially due to local translation of transcripts, such as *CamKII $\alpha$*  and *MAP2*, which is thought to regulate synaptic activity and neuronal plasticity (Huang *et al.*, 2003; Dahm, Kiebler and Macchi, 2007; Doyle and Kiebler, 2011). Additionally, there are some examples of RNAs that encode centrosomal proteins, such as *cen* and *PCNT*, localizing to the centrosome (Sepulveda *et al.*, 2018; Bergalet *et al.*, 2020). These examples highlight the functional importance between the localization of transcripts and the ultimate localization of their corresponding proteins.

Subcellular RNA localization has been identified to occur through a molecular motor transporting the RNA along a cytoskeletal element, such as actin and microtubule filaments (Tekotte and Davis, 2002). For example, RNAs known to be dependent upon actin for localization include *Ash1* in budding yeast (Takizawa *et al.*, 1997; Beach and Bloom, 2001), and  $\beta$ -*actin* in embryonic fibroblasts (Latham *et al.*, 2001), and *MAP2* in neurons (Balasanyan and Arnold, 2014). However, we found that while short-term disruption of actin dynamics by cytochalasin D disrupts development (Fig. S1A), it does not alter localization of RNA transcripts at the mitotic spindles (Fig. 3A, B). This result suggests that transport of majority of these RNAs is not along actin filaments, or that the level of actin disruption was insufficient to disrupt RNA localization.

Of note is that in order to quantify changes in localization of RNA transcripts at the spindle, we utilized a ratio of the mean fluorescence of a region between the dividing nuclei at anaphase to the mean fluorescence of an identically sized region in the cytoplasm. Importantly, the ratio of fluorescence at the spindle compared to the cytoplasm is similar among the DMSO-treated controls for all the small molecule inhibitors used (Fig. 3B, 4B, 5B and 6B), as well as between the control injected embryos (Fig. 7C). This indicates that this is a consistent way to objectively measure RNA localization to the spindle.

We observed that disruption of microtubule dynamics by colchicine abrogated the localization of these RNA transcripts at the mitotic spindle (Fig. 4A, B). This localization of transcripts could be due to RNA transcripts being actively transported along the microtubule filaments in a complex with a motor protein, as has been observed in neurons, muscles and fly embryos, among others (Lyons *et al.*, 2009; Goldman and Gonsalvez, 2017; Denes, Kelley and Wang, 2021). For example, the RNA-binding protein CPEB, known to localize *MAP2* to dendrites, has been found in granules with the motor proteins dynein and kinesin, suggesting that transport may occur along microtubule tracks (Huang *et al.*, 2003). Alternatively, the disruption of localization of these RNA transcripts upon colchicine treatment could be due to the RNA transcripts being anchored at the spindle and disruption of the microtubule filaments results in passive diffusion of the RNA transcripts. For example, apically localized transcripts in *Drosophila* blastoderm embryos, such as *run* and *ftz* transcripts are transported to the apical end of the embryos by dynein, which then becomes anchored to sponge bodies, which are electron-dense particles related to P-bodies, in a microtubule dependent manner (Delanoue and Davis, 2005). Disruption of microtubule dynamics alters localization of RNA to the mitotic spindle (Fig. 4A, B), indicating RNA localization to the spindle is dependent upon intact microtubules, but does



not distinguish between transport of RNA along the microtubules and anchoring of RNA to the microtubules.

To identify whether RNAs are transported along microtubule filaments, we investigated the role of motor proteins. The main motors that have been implicated in RNA transport are myosin, which transports RNA along actin filaments, and kinesins and dynein, which transport RNA along microtubule filaments (Takizawa *et al.*, 1997; Januschke *et al.*, 2002; Tekotte and Davis, 2002; Messitt *et al.*, 2008; Xu, Brechbiel and Gavis, 2013). To identify the role of microtubule motors in localization of RNA transcripts to the mitotic spindle, we used kinesore, a small-molecule inhibitor which prevents kinesin-1 from binding to its cargo (Randall *et al.*, 2017). We observed reduced localization of transcripts to the mitotic spindle in kinesore-treated embryos compared to control embryos (Fig. 5A, B). Our result is consistent with prior literature in which kinesin-1 has been identified to localize several RNA transcripts, such as *oskar* in *Drosophila* oocytes, *CamKII $\alpha$*  in oligodendrocytes (Kanai, Dohmae and Hirokawa, 2004), and *cyclin B* in *Danio* oocytes (Takahashi, Ishii and Yamashita, 2018). Both kinesin-1 and kinesin-2 are required to localize *Vg1* in *Xenopus* oocytes (Messitt *et al.*, 2008). Our data indicate that kinesin-1 plays a role in the localization of RNA transcripts to the mitotic spindles. We observe that kinesore has very little impact on the overall levels of transcripts, based on our qPCR data (Fig. 5C). While RNA *in situ* using FISH suggests that there may be slightly less *Dynein* in kinesore-treated embryos compared to control, the qPCR shows a small decrease, with no statistical significance. One caveat is that while qPCR analysis is quantitative, the embryos collected for this analysis are not all undergoing mitosis. Thus, if *Dynein* or another transcript undergoes cell-cycle specific changes in expression, this would not be detected with qPCR. However, the focus here is to examine the spatial localization of transcripts and we found kinesin-1 to be important for RNA localization.

Inhibition of AAA ATPase of dynein with ciliobrevin D results in transcript accumulation to the plus ends of the astral microtubules (Fig. 6A). This may be due to dynein directly transporting the RNA or through the ability of dynein to anchor RNA to microtubules (Delanoue and Davis, 2005). In addition, we observed that the mitotic spindle appears smaller (Fig. 6A), which has been observed previously in ciliobrevin D- treated cells (Firestone *et al.*, 2012). The exact mechanism of the smaller spindle is not known, but this may be due to the dynein's role in anchoring astral microtubules to the cortex of the cell (Hueschen *et al.*, 2017), and its ability to mediate microtubule sliding in a cortical direction (Okumura *et al.*, 2018). Since motor proteins kinesin-1 and dynein, as well as intact microtubules are needed for the localization of RNA at the spindles, our overall results indicate that the transcripts are transported along microtubules to their final destination at the midzone of the mitotic spindle.

The transcripts are observed at the midzone of the spindle throughout mitosis (Fig. 1A, C), and since kinesin-1 is a plus-ended motor (Block, Goldstein and Schnapp, 1990), while dynein is typically a minus-ended motor (Raaijmakers and Medema, 2014), we can speculate that these motors are important for balancing the localization of RNA to the spindle midzone. It is known that kinesin-1 and dynein cooperate to ensure proper RNA localization in *Drosophila* embryos, where both kinesin-1 and dynein work together to properly localize *bcd* and *gurken* RNAs (Januschke *et al.*, 2002). A caveat is that dynein is known to regulate mitotic spindle formation (Tanenbaum *et al.*, 2008; Hueschen *et al.*, 2017; Okumura *et al.*, 2018) and kinesin-1 does regulate centrosomal positioning (Splinter *et al.*, 2010) and microtubule sliding (Straube *et al.*, 2006). Inhibiting these functions may result in spindle defects that alter RNA localization independent of RNA interactions with these motors. Further research will be needed to specifically separate these two functions.

We identified that the 3'UTR of *Aurora B* is necessary and sufficient for its localization to the mitotic spindles (Fig. 7B). In addition, deletion of the CPE or blockage of the CPE within the 3'UTR prevents localization of exogenous *Aurora B-Rluc* to the mitotic spindles (Fig. 7B,C). CPEB has been identified to be necessary for localization of *cyclin B* RNA of *Xenopus* embryos (Groisman *et al.*, 2000), as well as for *BUB3* RNA, which encodes a mitotic checkpoint protein, to the mitotic spindle (Pascual *et al.*, 2021). Preventing CPEB from binding to *cyclin B* RNA results in defects in mitosis (Groisman *et al.*, 2000; Pascual *et al.*, 2021). Similar to *cyclin B*, deletion of CPE within *Aurora B* 3'UTR had completely abolished *Aurora B*'s localization (Fig. 7A). Further, blocking CPE site within *Aurora B* 3'UTR also resulted in a significant reduction of localized transcript at the spindles (Fig. 7B,C). This reduction, rather than a complete abolishment of localization, may be due to the AT-rich sequence in the 3'UTR region that result in a weaker binding of the blocking oligo to the endogenous CPE within *Aurora B* transcripts. Importantly, we also observed that blocking the CPE in endogenous *Aurora B* transcript results in developmental arrest (Fig. 7D). Approximately 50% of the CPE blocking oligo-injected embryos do not live to the blastulae stage (24 hpf) (Fig S2), indicating that the embryos experiencing developmental arrest do not survive. We do not know the exact mechanism of how mislocalization of *Aurora B* transcript away from the spindles causes developmental arrest and lethality. Potentially, disrupting localization of *Aurora B* transcript has a similar effect as blocking *cyclin B* transcript's localization to the mitotic spindles (Groisman *et al.*, 2000). In the case of mislocalization of *cyclin B*, these mitotic defects occur while cyclin B protein levels continue to display normal oscillations throughout the cell cycle, similar to the control (Groisman *et al.*, 2000). It was suggested that the defects in mitosis are not due to a global deficit of cyclin B protein, but rather, the localization of the *cyclin B* transcript and its local translation at the mitotic spindle itself is important for progression through

mitosis (Groisman *et al.*, 2000). Since ribosomal proteins and RNAs are present at the mitotic spindle and in early cleavage stage embryos (Hassine *et al.*, 2020; Fernandez-Nicolas *et al.*, 2022), an intriguing possibility is that local translation of these transcripts encoding proteins that regulate mitosis may be essential for mitotic progression.

Aurora B functions by sensing bi-polar attachment of chromosomes to the mitotic spindle (Krenn and Musacchio, 2015). This is essential to Aurora B's regulation of the SAC through phosphorylation of its substrates leading to degradation of securin (Lens *et al.*, 2003; Krenn and Musacchio, 2015).

Interestingly, preventing Aurora B protein from localizing to the centrosomal region results in defects in mitosis, despite the fact that they retain kinase ability (Scrittore *et al.*, 2005). Aurora B also has a function in error correction during anaphase, where it rapidly corrects lagging chromosomes that if left uncorrected can result in micronuclei formation (Orr *et al.*, 2021; Sen *et al.*, 2021).

Interestingly, we observe *Aurora B* RNA localized at the spindle midzone in both metaphase and anaphase (Fig. S2B), consistent with its roles in both phases of mitosis. Together with results from prior studies and our study, we propose that Aurora B's protein function is tightly tied to its transcript localization which adds another layer of regulation of mitosis (Fig. 8). We propose that this regulation extends to other important mitotic regulators as well. Intriguingly, this RNA localization is a conserved phenomenon observed in mammalian cells as well (Fig. 2). Since mitosis, especially during the early cleavage stages of development, must occur rapidly and be tightly controlled, localizing the RNA of key players of mitosis may be an evolutionarily conserved mechanism to facilitate rapid changes in the translation of these RNAs, allowing for proper cell division to occur.

## **Materials & Methods:**

### ***Animals***

Adult *Strongylocentrotus purpuratus* were collected from Marinus Scientific, LLC (Lakewood, CA) or Point Loma Marine Invertebrate Labs (Lakeside, CA) and were maintained at 12°C in artificial sea water (ASW) made from distilled, deionized water and Instant Ocean®. Adults were induced to shed either through shaking or intracoelomic injection of 0.5 M KCl. Embryos were cultured at 12°C in filtered natural sea water (FSW) obtained from the Indian River Inlet (University of Delaware).

### ***Cell culture***

LLC-PK1 (Hull, Cherry and Weaver, 1976) (LLC-PK1, ATCC No. CL-101) cells were maintained in DMEM/F12 (ThermoFisher Scientific, Waltham, MA) media supplemented with 10% fetal bovine serum (MilliporeSigma, Burlington, MA) at 37°C under 5% CO<sub>2</sub>.

### ***Fluorescence RNA in situ Hybridization (FISH) and immunolabeling***

The steps performed for FISH are described previously with modifications (Sethi, Angerer and Angerer, 2014). RNA *in situ* hybridization probes were

amplified using sea urchin cDNA for sea urchin specific probes and porcine cDNA for mammalian probes. Primers were synthesized based on known sequences (IDTDNA, Coralville, Iowa) and amplicons were ligated into the ZeroBlunt vector (ThermoFisher Scientific, Waltham, MA) (Table 1). Positive clones were sequenced (Genewiz Services, South Plainfield, NJ), digested (ThermoFisher, Scientific, Waltham, MA) and DIG labeled using specific RNA polymerases (MilliporeSigma, Burlington, MA) described in Table 1. Probe was used at 0.5 ng probe/ $\mu$ L to detect native transcript in embryos, according to previous protocols (Stepicheva *et al.*, 2015). The embryos were incubated with anti-digoxigenin-POD antibody at 1:1,000 (MilliporeSigma, St. Louis, MO) overnight at 4°C and amplified with Tyramide Amplification working solution (1:150 dilution of TSA stock with 1x Plus Amplification Diluent-fluorescence) (Akoya Biosciences, Marlborough, MA). The embryos were washed with MOPS buffer three times then with PBST (1xPBS, 0.1% TritonX-100) three times. After FISH, embryos were incubated for overnight at 4°C in E7 antibody against  $\beta$ -tubulin (Developmental Studies Hybridoma Bank, Iowa City, IA) diluted to 5  $\mu$ g mL<sup>-1</sup> in 4% sheep serum in PBST. Embryos were washed three times with PBST then incubated for 1 hour at room temperature with secondary antibody (Alexa-Fluor 647, Thermo Fisher Scientific, Waltham, MA) diluted at 1:300 in 4% sheep serum (MilliporeSigma, Burlington, MA) in PBST. Embryos were washed three times with PBST, then counter-stained with DAPI (ThermoFisher Scientific, Waltham, MA). Images were obtained with a Zeiss LSM 780 or 880 scanning confocal microscope (Carl Zeiss Incorporation, Thorwood, NY). Single digital image or the maximum intensity projections of Z-stack of images were acquired with Zen software and exported into Adobe Photoshop and Illustrator (Adobe, San Jose, CA) for further processing.

LLC-PK cells were fixed (100  $\mu$ M MOPS, 0.1% Tween, 4% paraformaldehyde in PBS) for 15 minutes at room temperature, then washed

with PBS 0.01% Tween. Cells were hybridized as described (Martín-Durán *et al.*, 2017), and incubated with 0.5 ng  $\mu\text{L}^{-1}$  probe at 50°C for 48 hours. The cells were incubated with anti-digoxigenin-POD antibody at 1:1,000 (MilliporeSigma, Burlington, MA) for 1 hour at room temperature and amplified with Tyramide Amplification working solution (1:150 dilution of TSA stock with 1x Plus Amplification Diluent-fluorescence) (Akoya Biosciences, Marlborough, MA). Cells were then incubated at room temperature in anti- $\alpha$ -tubulin antibody (Cat. No. 6603-1, Proteintech, Rosemont, IL) at 1:100 dilution in 4% sheep serum in PBST for 1 hour at room temperature. Cells were washed three times with PBST then incubated for 1 hour at room temperature with secondary antibody (Alexa-Fluor 647, Thermo Fisher Scientific, Waltham, MA) diluted at 1:300 in 4% sheep serum (MilliporeSigma, Burlington, MA) in PBST. Cells were mounted in VectaShield Anti-Fade mounting media with DAPI (Vector Laboratories, Newark, CA). Images were obtained with a Zeiss LSM 780 or 880 scanning confocal microscope (Carl Zeiss Incorporation, Thorwood, NY). Single digital image or the maximum intensity projections of Z-stack of images were acquired with Zen software and exported into Adobe Photoshop and Illustrator (Adobe, San Jose, CA) for further processing. Excess DNA in the images is due to sperm and does not affect the interpretation of the results.

### ***Microinjections and RNA constructs***

Microinjections were performed as previously described with modifications (Cheers and Ettensohn, 2004; Song *et al.*, 2012; Stepicheva and Song, 2015). Injection solutions contained 20% sterile glycerol, 2 mg  $\text{mL}^{-1}$  10,000 MW FITC lysine charged dextran (ThermoFisher Scientific, Waltham, MA) and 50 ng  $\mu\text{L}^{-1}$  of *Renilla* Luciferase (RLuc) constructs. Injections were performed using the Pneumatic pump system (World Precision Instruments, Sarasota, FL) (Stepicheva and Song, 2015; Stepicheva *et al.*, 2015). A vertical

needle puller PL-10 (Narishige, Tokyo, Japan) was used to pull the injection needles (1 mm glass capillaries with filaments) (Narishige Tokyo, Japan).

The 3'UTR of *Aurora B* was amplified with PCR using sea urchin cDNA and cloned into the ZeroBlunt vector (ThermoFisher Scientific, Waltham, MA) (Table 1 Primers). Positive clones were sequenced (Genewiz Services, South Plainfield, NJ) and subcloned into *RLuc* as described previously (Stepicheva *et al.*, 2015). The CPE element was identified bioinformatically and was deleted from the plasmid using site-directed mutagenesis (Lightning QuikChange Mutagenesis, Agilent, Santa Clara, CA). DNA sequencing of these plasmids indicated successful deletion (Genewiz, NJ). The plasmids were digested with EcoRI (ThermoFisher, Scientific, Waltham, MA) and RNA was *in vitro* transcribed using mMESSAGE mMACHINE Sp6 Transcription Kit (ThermoFisher, Scientific, Waltham, MA). mRNA was purified using NucleoSpin RNA clean up kit (Macherey-Nagel, Bethlehem, PA), and passed through a Millipore Ultrafree 0.22  $\mu$ m centrifugal filter (MilliporeSigma, St. Louis, MO) prior to microinjections. RNA constructs were injected at a final concentration of 50 ng  $\mu$ L<sup>-1</sup>.

### ***Block CPE element with antisense morpholino oligonucleotides (MASO)***

To examine if CPE element is important for localization of *Aurora B* transcript to the mitotic spindles, we designed a target protector MASO (TP) blocking the cytoplasmic polyadenylation element (CPE): 5' AGCTCGAATGATAAAGCTTACTTTAAAACA 3', with CPE sequence underlined (GeneTools, Philomath, OR). Due to the high A-T content of this CPE region, the TP sequence was designed to be a 30-mer to ensure sufficient affinity to the *Aurora B* transcript. For negative controls, we used 5' CCTCTTACCTCAGTTACAATTTATA 3', that targets a human *beta-globin* intron mutation purchased from GeneTools (Philomath, OR). We also designed a



negative control TP complementary to the 3'UTR of *Aurora B*: 5' CTCAACATACGTTTTTCATACAAAGT 3' that is upstream of the CPE. Embryos were injected with a final concentration of 5  $\mu$ M, 50  $\mu$ M, and 500  $\mu$ M, and observed at 24 hpf to determine which concentration resulted in 50% mortality. All experiments described were performed using a final concentration of 500  $\mu$ M.

Embryos were injected with negative control, *Aurora B* TP control and *Aurora B* CPE TPs, then the embryos were assessed for stage of development every hour after fertilization until 6 hpf.

### **Drug studies**

Physiologic embryos were fertilized and cultured to 16-32 cell stage (~5 hpf) and were treated with either kinesore 50  $\mu$ M, ciliobrevin D 100  $\mu$ M, colchicine 10 mM, cytochalasin D 20  $\mu$ M, or DMSO at equivalent concentrations in FSW for 30 minutes at 12°C. All drugs are obtained from MilliporeSigma (Burlington, MA) and dissolved in DMSO. The embryos were then fixed immediately and followed by FISH or collected for real time, quantitative PCR (qPCR).

### **Real time, quantitative PCR (qPCR)**

To examine the relative quantities of transcripts of *Aurora B*, *Polo kinase*, *Dynein*, *Staufen* and *Tubulin  $\alpha$ 1* after disruption of cytoskeletal dynamics, we used qPCR to examine their transcript levels. Two hundred eggs or embryos were collected immediately prior to treatment with kinesore, ciliobrevin D, colchicine, cytochalasin D or DMSO and immediately after treating for 30 minutes. Total RNA was extracted with NucleoSpin RNA XS kit (Macherey-Nagel, Bethlehem, PA). cDNA was synthesized using the iScript cDNA synthesis kit (BioRad, Hercules, CA). qPCR was performed using 7.5 embryo equivalents for each reaction using Fast SYBR Green Master Mix (ThermoFisher Scientific, Waltham,

MA). Reactions were run on the QuantStudio 6 Real-Time PCR cyclers system (ThermoFisher Scientific, Waltham, MA), as previously described (Sampilo *et al.*, 2018). Threshold cycle (Ct) values were normalized first to *ubiquitin* and shown as percentage of transcript compared with DMSO treated embryos, using the  $2^{-\Delta\Delta Ct}$  method (Stepicheva and Song, 2015) and converting fold-change to percentage. Primers were designed using Primer3 (Untergasser *et al.*, 2012) (Table 1).

### **Image J Analysis**

To quantitatively analyze the enrichment of transcripts to the mitotic spindle, single plane images of embryos containing blastomeres in anaphase were exported from Zen as TIFFs. These images were opened in ImageJ (Schneider, Rasband and Eliceiri, 2012). A region spanning the area between the chromosomes was selected and the mean fluorescence intensity (MFI) was measured, the spindle MFI. The spindle region was then masked from the entire blastomere area and the MFI of this region was measured, the cytoplasmic MFI. The ratio was then calculated by dividing the spindle MFI by the cytoplasmic MFI.

### **Immunolabeling and phalloidin staining**

To examine the localization of NuMA and  $\alpha$ -tubulin, embryos were immunolabeled with the respective antibodies, as previously described (Remsburg, Testa and Song, 2021; Konrad and Song, 2022) with modifications. Embryos were fixed in 100% ice-cold methanol on ice for 10 minutes, then washed with PBST three times. They were then blocked in PBST with 4% sheep serum at room temperature for 1 hour. Embryos were then incubated in anti-NuMA antibody (Cat. No. 16607-1, Proteintech, Rosemont, IL) at 1:100 dilution and anti- $\alpha$ -tubulin antibody (Cat. No. 6603-1, Proteintech, Rosemont, IL)

at 1:100 dilution overnight at 4°C. Embryos were then washed with PBST three times and incubated sequentially in secondary antibody (anti-rabbit AlexaFluor 488 and anti-mouse AlexaFluor 647, Thermo Fisher Scientific, Waltham, MA) diluted to 1:300 in 4% sheep serum (MilliporeSigma, Burlington, MA) in PBST. Embryos were washed three times with PBST, then counter-stained with DAPI (ThermoFisher Scientific, Waltham, MA). Images were obtained with a Zeiss LSM 780 or 880 scanning confocal microscope (Carl Zeiss Incorporation, Thorwood, NY). Single digital image or the maximum intensity projections of Z-stack of images were acquired with Zen software and exported into Adobe Photoshop and Illustrator (Adobe, San Jose, CA) for further processing.

To examine F-actin, embryos were labeled with fluorescently conjugated phalloidin as previously described (Konrad and Song, 2022) with minor modifications. AlexaFluor-647 conjugated phalloidin was reconstituted in DMSO, then diluted to 10U mL<sup>-1</sup> in PBST. Embryos were washed three times with PBST, then counter-stained with DAPI (ThermoFisher Scientific, Waltham, MA). Images were obtained using Zen software and a Zeiss ObserverZ1 using an AxioCam MRm.

## Acknowledgements

The authors would like to thank Elizabeth McCulla and other undergraduate students in BISC412 who helped generate the RNA *in situ* probes used in this manuscript. We also thank Nina Faye Sampilo for the *NuMA* FISH images. The authors would also like to thank Dr. Gary Laverty (University of Delaware) for his kind gift of the LLC-PK1 cells. Figures were created with using Biorender.com. We would also like to thank the anonymous reviewers for their insightful comments.

## Funding

This work was supported by: NSF IOS (1553338) & MCB (2103453) grants to J.L.S. NIH/P20GM103653; University of Delaware fellowship to CR and KK. Sigma Xi grant to CR.

## References

- Anstrom, J. A. (1992) 'Microfilaments, cell shape changes, and the formation of primary mesenchyme in sea urchin embryos', *Journal of Experimental Zoology*, 264(3), pp. 312–322. doi: 10.1002/jez.1402640310.
- Araujo, A. R. *et al.* (2016) 'Positive Feedback Keeps Duration of Mitosis Temporally Insulated from Upstream Cell-Cycle Events', *Molecular cell*. Mol Cell, 64(2), pp. 362–375. doi: 10.1016/J.MOLCEL.2016.09.018.
- Arshinoff, B. I. *et al.* (2022) 'Echinobase: leveraging an extant model organism database to build a knowledgebase supporting research on the genomics and biology of echinoderms', *Nucleic acids research*. Nucleic Acids Res, 50(D1), pp. D970–D979. doi: 10.1093/NAR/GKAB1005.
- Babkoff, A. *et al.* (2021) 'Aurora-B phosphorylates the myosin II heavy chain to promote cytokinesis', *The Journal of biological chemistry*. J Biol Chem, 297(3). doi: 10.1016/J.JBC.2021.101024.
- Balasanyan, V. and Arnold, D. B. (2014) 'Actin and myosin-dependent localization of mRNA to dendrites', *PloS one*. PLoS One, 9(3). doi: 10.1371/JOURNAL.PONE.0092349.
- Beach, D. L. and Bloom, K. (2001) 'ASH1 mRNA localization in three acts', *Molecular biology of the cell*. Mol Biol Cell, 12(9), pp. 2567–2577. doi: 10.1091/MBC.12.9.2567.

Bergalet, J. *et al.* (2020) 'Inter-dependent Centrosomal Co-localization of the cen and ik2 cis-Natural Antisense mRNAs in Drosophila', *Cell reports*. Cell Rep, 30(10), pp. 3339-3352.e6. doi: 10.1016/J.CELREP.2020.02.047.

Block, S. M., Goldstein, L. S. B. and Schnapp, B. J. (1990) 'Bead movement by single kinesin molecules studied with optical tweezers', *Nature*. Nature, 348(6299), pp. 348–352. doi: 10.1038/348348A0.

Blower, M. D. *et al.* (2007) 'Genome-wide analysis demonstrates conserved localization of messenger RNAs to mitotic microtubules.', *The Journal of cell biology*. J Cell Biol, 179(7), pp. 1365–1373. doi: 10.1083/jcb.200705163.

Böttcher, R. T. *et al.* (2009) 'Profilin 1 is required for abscission during late cytokinesis of chondrocytes', *The EMBO journal*. EMBO J, 28(8), pp. 1157–1169. doi: 10.1038/EMBOJ.2009.58.

Boutros, R., Dozier, C. and Ducommun, B. (2006) 'The when and wheres of CDC25 phosphatases', *Current Opinion in Cell Biology*. Curr Opin Cell Biol, 18(2), pp. 185–191. doi: 10.1016/j.ceb.2006.02.003.

Broadus, J., Fuerstenberg, S. and Doe, C. Q. (1998) 'Staufen-dependent localization of prospero mRNA contributes to neuroblast daughter-cell fate', *Nature*. Nature, 391(6669), pp. 792–795. doi: 10.1038/35861.

Castro, A. *et al.* (2005) 'The anaphase-promoting complex: A key factor in the regulation of cell cycle', *Oncogene*. Oncogene, pp. 314–325. doi: 10.1038/sj.onc.1207973.

Chaigne, A. *et al.* (2016) 'F-actin mechanics control spindle centring in the mouse zygote', *Nature Communications*. Nature Publishing Group, 7. doi: 10.1038/ncomms10253.

Chassé, H. *et al.* (2016) 'Cyclin B Translation Depends on mTOR Activity after Fertilization in Sea Urchin Embryos', *PLoS one*. PLoS One, 11(3). doi: 10.1371/JOURNAL.PONE.0150318.

Cheers, M. S. and Ettensohn, C. A. (2004) 'Rapid microinjection of fertilized eggs', *Methods in Cell Biology*, 74, pp. 287–310.

Cheeseman, I. M. *et al.* (2002) 'Phospho-regulation of kinetochore-microtubule attachments by the Aurora kinase Ipl1p', *Cell*. Elsevier B.V., 111(2), pp. 163–172. doi: 10.1016/S0092-8674(02)00973-X.

Cheeseman, I. M. *et al.* (2006) 'The conserved KMN network constitutes the core microtubule-binding site of the kinetochore', *Cell*. Cell, 127(5), pp. 983–997. doi: 10.1016/J.CELL.2006.09.039.

Cochran, J. C. *et al.* (2005) 'Monastrol inhibition of the mitotic kinesin Eg5', *Journal of Biological Chemistry*. J Biol Chem, 280(13), pp. 12658–12667. doi: 10.1074/jbc.M413140200.

Combes, G. *et al.* (2017) 'Playing polo during mitosis: PLK1 takes the lead', *Oncogene*. Nature Publishing Group, 36(34), pp. 4819–4827. doi: 10.1038/onc.2017.113.

Craney, A. *et al.* (2016) 'Control of APC/C-dependent ubiquitin chain elongation by reversible phosphorylation', *Proceedings of the National Academy of Sciences of the United States of America*. Proc Natl Acad Sci U S A, 113(6), pp. 1540–1545. doi: 10.1073/pnas.1522423113.

Craske, B. and Welburn, J. P. I. (2020) 'Leaving no-one behind: how CENP-E facilitates chromosome alignment', *Essays in biochemistry*. Essays Biochem, 64(2), pp. 313–324. doi: 10.1042/EBC20190073.

Dahm, R., Kiebler, M. and Macchi, P. (2007) 'RNA localisation in the nervous system', *Seminars in cell & developmental biology*. Semin Cell Dev Biol, 18(2), pp. 216–223. doi: 10.1016/J.SEMCDB.2007.01.009.

Delanoue, R. and Davis, I. (2005) 'Dynein Anchors Its mRNA Cargo after Apical Transport in the Drosophila Blastoderm Embryo', *Cell*. Cell Press, 122(1), pp. 97–106. doi: 10.1016/J.CELL.2005.04.033.

Denes, L. T., Kelley, C. P. and Wang, E. T. (2021) 'Microtubule-based transport is essential to distribute RNA and nascent protein in skeletal muscle', *Nature communications*. Nat Commun, 12(1). doi: 10.1038/S41467-021-26383-9.

Dephoure, N. *et al.* (2008) 'A quantitative atlas of mitotic phosphorylation', *Proceedings of the National Academy of Sciences of the United States of America*. Proc Natl Acad Sci U S A, 105(31), pp. 10762–10767. doi: 10.1073/pnas.0805139105.

Dimitrova-Paternoga, L. *et al.* (2021) 'Molecular basis of mRNA transport by a kinesin-1-atypical tropomyosin complex', *Genes and Development*. Cold Spring Harbor Laboratory Press, 35(13), pp. 1–16. doi: 10.1101/GAD.348443.121/-/DC1.

Doyle, M. and Kiebler, M. A. (2011) 'Mechanisms of dendritic mRNA transport and its role in synaptic tagging', *The EMBO journal*. EMBO J, 30(17), pp. 3540–3552. doi: 10.1038/EMBOJ.2011.278.

Farina, K. L. *et al.* (2003) 'Two ZBP1 KH domains facilitate  $\beta$ -actin mRNA localization, granule formation, and cytoskeletal attachment', *Journal of Cell Biology*. Rockefeller University Press, 160(1), pp. 77–87. doi: 10.1083/jcb.200206003.

Fernandez-Nicolas, A. *et al.* (2022) 'Vasa nucleates asymmetric translation along the mitotic spindle during unequal cell divisions', *Nature communications*. Nat Commun, 13(1). doi: 10.1038/S41467-022-29855-8.

Firestone, A. J. *et al.* (2012) 'Small-molecule inhibitors of the AAA+ ATPase motor cytoplasmic dynein', *Nature*. Nature, 484(7392), pp. 125–129. doi: 10.1038/nature10936.

Fukuda, Y. *et al.* (2021) 'Binding and transport of SFPQ-RNA granules by KIF5A/KLC1 motors promotes axon survival', *The Journal of cell biology*. J Cell Biol, 220(1). doi: 10.1083/JCB.202005051.

Gadde, S. and Heald, R. (2004) 'Mechanisms and molecules of the mitotic spindle', *Current Biology*. Curr Biol. doi: 10.1016/j.cub.2004.09.021.

Gelens, L. and Saurin, A. T. (2018) 'Developmental Cell Commentary Exploring the Function of Dynamic Phosphorylation-Dephosphorylation Cycles', *Developmental Cell*, 44, pp. 659–663. doi: 10.1016/j.devcel.2018.03.002.

Goldman, C. H. and Gonsalvez, G. B. (2017) 'The role of microtubule motors in mRNA localization and patterning within the *Drosophila* oocyte', in *Results and Problems in Cell Differentiation*. Results Probl Cell Differ, pp. 149–168. doi: 10.1007/978-3-319-60855-6\_7.

Groisman, I. *et al.* (2000) 'CPEB, maskin, and cyclin B1 mRNA at the mitotic apparatus: implications for local translational control of cell division.', *Cell*. Cell, 103(3), pp. 435–447. doi: 10.1016/S0092-8674(00)00135-5.

Hall, I. M. *et al.* (2002) 'Establishment and maintenance of a heterochromatin domain', *Science*. Science, 297(5590), pp. 2232–2237. doi: 10.1126/science.1076466.



Hassine, S. *et al.* (2020) 'Staufen1 localizes to the mitotic spindle and controls the localization of RNA populations to the spindle', *Journal of cell science*. NLM (Medline), 133(14). doi: 10.1242/jcs.247155.

Hein, J. B. *et al.* (2017) 'Distinct kinetics of serine and threonine dephosphorylation are essential for mitosis', *Nature Cell Biology*. Nat Cell Biol, 19(12), pp. 1433–1440. doi: 10.1038/ncb3634.

Herbert, A. L. *et al.* (2017) 'Dynein/dynactin is necessary for anterograde transport of Mbp mRNA in oligodendrocytes and for myelination in vivo', *Proceedings of the National Academy of Sciences of the United States of America*. National Academy of Sciences, 114(43), pp. E9153–E9162. doi: 10.1073/PNAS.1711088114/-/DCSUPPLEMENTAL.

Hirokawa, N. *et al.* (2009) 'Kinesin superfamily motor proteins and intracellular transport', *Nature Reviews Molecular Cell Biology* 2009 10:10. Nature Publishing Group, 10(10), pp. 682–696. doi: 10.1038/nrm2774.

Höfer, D., Ness, W. and Drenckhahn, D. (1997) 'Sorting of actin isoforms in chicken auditory hair cells', *Journal of cell science*. J Cell Sci, 110 ( Pt 6)(6), pp. 765–770. doi: 10.1242/JCS.110.6.765.

Huang, Y. S. *et al.* (2003) 'Facilitation of dendritic mRNA transport by CPEB', *Genes and Development*. Genes Dev, 17(5), pp. 638–653. doi: 10.1101/gad.1053003.

Hueschen, C. L. *et al.* (2017) 'NuMA recruits dynein activity to microtubule minus-ends at mitosis', *eLife*. Elife, 6. doi: 10.7554/ELIFE.29328.

Hull, R. N., Cherry, W. R. and Weaver, G. W. (1976) 'The origin and characteristics of a pig kidney cell strain, LLC-PK', *In vitro. In Vitro*, 12(10), pp. 670–677. doi: 10.1007/BF02797469.

Ikegami, R. *et al.* (1994) 'Effect of inhibitors of DNA replication on early zebrafish embryos: evidence for coordinate activation of multiple intrinsic cell-cycle checkpoints at the mid-blastula', *cambridge.org*, 5, pp. 153–175. doi: 10.1017/S0967199400003828.

Jambhekar, A. *et al.* (2014) 'RNA stimulates Aurora B kinase activity during mitosis', *PLoS ONE*. PLoS One, 9(6). doi: 10.1371/journal.pone.0100748.

Januschke, J. *et al.* (2002) 'Polar transport in the *Drosophila* oocyte requires Dynein and Kinesin I cooperation', *Current Biology*. Curr Biol, 12(23), pp. 1971–1981. doi: 10.1016/S0960-9822(02)01302-7.

Johnson, W. L. *et al.* (2017) 'RNA-dependent stabilization of SUV39H1 at constitutive heterochromatin', *eLife*. Elife, 6. doi: 10.7554/elife.25299.

Joseph, E. M. and Melton, D. A. (1998) 'Mutant Vg1 ligands disrupt endoderm and mesoderm formation in *Xenopus* embryos', *Development (Cambridge, England)*. Development, 125(14), pp. 2677–2685. doi: 10.1242/DEV.125.14.2677.

Kaji, N., Muramoto, A. and Mizuno, K. (2008) 'LIM kinase-mediated cofilin phosphorylation during mitosis is required for precise spindle positioning', *The Journal of biological chemistry*. J Biol Chem, 283(8), pp. 4983–4992. doi: 10.1074/JBC.M708644200.

Kanai, Y., Dohmae, N. and Hirokawa, N. (2004) 'Kinesin transports RNA: isolation and characterization of an RNA-transporting granule', *Neuron*. Neuron, 43(4), pp. 513–525. doi: 10.1016/J.NEURON.2004.07.022.

Kingsley, E. P. *et al.* (2007) 'Widespread RNA segregation in a spiralian embryo', *Evolution & development*. Evol Dev, 9(6), pp. 527–539. doi: 10.1111/J.1525-142X.2007.00194.X.

Kloc, M. and Etkin, L. D. (1994) 'Delocalization of Vg1 mRNA from the vegetal cortex in *Xenopus* oocytes after destruction of Xlsirt RNA', *Science (New York, N.Y.)*. Science, 265(5175), pp. 1101–1103. doi: 10.1126/SCIENCE.7520603.

Konrad, K. D. and Song, J. L. (2022) 'microRNA-124 regulates Notch and NeuroD1 to mediate transition states of neuronal development', *Developmental neurobiology*. Dev Neurobiol. doi: 10.1002/DNEU.22902.

Krenn, V. and Musacchio, A. (2015) 'The Aurora B Kinase in Chromosome Bi-Orientation and Spindle Checkpoint Signaling', *Frontiers in oncology*. Front Oncol, 5(OCT). doi: 10.3389/FONC.2015.00225.

Kronja, I. *et al.* (2009) 'XMAP215-EB1 interaction is required for proper spindle assembly and chromosome segregation in *Xenopus* egg extract', *Molecular biology of the cell*. Mol Biol Cell, 20(11), pp. 2684–2696. doi: 10.1091/MBC.E08-10-1051.

Kunda, P. and Baum, B. (2009) 'The actin cytoskeleton in spindle assembly and positioning', *Trends in Cell Biology*, pp. 174–179. doi: 10.1016/j.tcb.2009.01.006.

Labit, H. *et al.* (2012) 'Dephosphorylation of Cdc20 is required for its C-box-dependent activation of the APC/C', *EMBO Journal*. EMBO J, 31(15), pp. 3351–3362. doi: 10.1038/emboj.2012.168.

Lane, M. C. *et al.* (1993) 'A role for regulated secretion of apical extracellular matrix during epithelial invagination in the sea urchin.', *Development (Cambridge, England)*, 117(3), pp. 1049–1060. Available at: <http://www.ncbi.nlm.nih.gov/pubmed/8325234>.

Lanni, J. S. and Jacks, T. (1998) 'Characterization of the p53-Dependent Postmitotic Checkpoint following Spindle Disruption', *Molecular and Cellular Biology*. Mol Cell Biol, 18(2), pp. 1055–1064. doi: 10.1128/mcb.18.2.1055.

Latham, V. M. *et al.* (2001) 'A Rho-dependent signaling pathway operating through myosin localizes beta-actin mRNA in fibroblasts', *Current biology : CB*. Curr Biol, 11(13), pp. 1010–1016. doi: 10.1016/S0960-9822(01)00291-3.

Lécuyer, E. *et al.* (2007) 'Global analysis of mRNA localization reveals a prominent role in organizing cellular architecture and function', *Cell*. Cell, 131(1), pp. 174–187. doi: 10.1016/J.CELL.2007.08.003.

Lee, S. J. *et al.* (2017) 'The PP2AB56 phosphatase promotes the association of Cdc20 with APC/C in mitosis', *Journal of Cell Science*. J Cell Sci, 130(10), pp. 1760–1771. doi: 10.1242/jcs.201608.

Lens, S. M. A. *et al.* (2003) 'Survivin is required for a sustained spindle checkpoint arrest in response to lack of tension', *EMBO Journal*. EMBO J, 22(12), pp. 2934–2947. doi: 10.1093/emboj/cdg307.

Li, L., Yu, J. and Ji, S. J. (2021) 'Axonal mRNA localization and translation: local events with broad roles', *Cellular and molecular life sciences : CMLS*. Cell Mol Life Sci, 78(23), pp. 7379–7395. doi: 10.1007/S00018-021-03995-4.

Li, Z. and Zhang, X. (2017) 'Kinases involved in both autophagy and mitosis', *International Journal of Molecular Sciences*. Int J Mol Sci. doi: 10.3390/ijms18091884.

Lindqvist, A., Rodríguez-Bravo, V. and Medema, R. H. (2009) 'The decision to enter mitosis: feedback and redundancy in the mitotic entry network', *Journal of Cell Biology*. J Cell Biol, pp. 193–202. doi: 10.1083/jcb.200812045.

Liu, H. *et al.* (2015) 'Mitotic Transcription Installs Sgo1 at Centromeres to Coordinate Chromosome Segregation', *Molecular Cell*. Mol Cell, 59(3), pp. 426–436. doi: 10.1016/j.molcel.2015.06.018.

Lyons, D. A. *et al.* (2009) 'Kif1b is essential for mRNA localization in oligodendrocytes and development of myelinated axons', *Nature Genetics*. Nat Genet, 41(7), pp. 854–858. doi: 10.1038/ng.376.

Mann, B. J. and Wadsworth, P. (2019) 'Kinesin-5 Regulation and Function in Mitosis', *Trends in Cell Biology*. Trends Cell Biol, pp. 66–79. doi: 10.1016/j.tcb.2018.08.004.

Martín-Durán, J. M. *et al.* (2017) 'The developmental basis for the recurrent evolution of deuterostomy and protostomy', *Nature Ecology & Evolution*. Nat Ecol Evol, 1(1). doi: 10.1038/s41559-016-0005.

Martínez-Balbás, M. A. *et al.* (1995) 'Displacement of sequence-specific transcription factors from mitotic chromatin', *Cell*. Cell, 83(1), pp. 29–38. doi: 10.1016/0092-8674(95)90231-7.

Mayford, M. *et al.* (1996) 'The 3'-untranslated region of CaMKII $\alpha$  is a cis-acting signal for the localization and translation of mRNA in dendrites', *Proceedings of the National Academy of Sciences of the United States of America*. National Academy of Sciences, 93(23), pp. 13250–13255. doi: 10.1073/pnas.93.23.13250.

McClay, D. R. (2011) 'Evolutionary crossroads in developmental biology: sea urchins', *Development (Cambridge, England)*, 138(13), pp. 2639–2648. doi: 10.1242/dev.048967.

McIntosh, J. R. (2016) 'Mitosis', *Cold Spring Harbor Perspectives in Biology*. Cold Spring Harbor Laboratory Press, 8(9). doi: 10.1101/cshperspect.a023218.

Messitt, T. J. *et al.* (2008) 'Multiple Kinesin Motors Coordinate Cytoplasmic RNA Transport on a Subpopulation of Microtubules in *Xenopus* Oocytes', *Developmental Cell*. Dev Cell, 15(3), pp. 426–436. doi: 10.1016/j.devcel.2008.06.014.

Moura, M. and Conde, C. (2019) 'Phosphatases in Mitosis: Roles and regulation', *Biomolecules*. Biomolecules. doi: 10.3390/biom9020055.

Mowry, K. L. and Melton, D. A. (1992) 'Vegetal messenger RNA localization directed by a 340-nt RNA sequence element in *Xenopus* oocytes', *Science*. Science, 255(5047), pp. 991–994. doi: 10.1126/science.1546297.

Nilsson, J. (2019) 'Protein phosphatases in the regulation of mitosis', *Journal of Cell Biology*. J Cell Biol, pp. 395–409. doi: 10.1083/jcb.201809138.

Okumura, M. *et al.* (2018) 'Dynein–Dynactin–NuMA clusters generate cortical spindle-pulling forces as a multi-arm ensemble', *eLife*. eLife Sciences Publications, Ltd, 7. doi: 10.7554/ELIFE.36559.

Orr, B. *et al.* (2021) 'An anaphase surveillance mechanism prevents micronuclei formation from frequent chromosome segregation errors', *Cell Reports*. Cell Press, 37(6), p. 109783. doi: 10.1016/J.CELREP.2021.109783.

Orth, J. D. *et al.* (2012) 'Prolonged mitotic arrest triggers partial activation of apoptosis, resulting in DNA damage and p53 induction', *Molecular Biology of the Cell*. Mol Biol Cell, 23(4), pp. 567–576. doi: 10.1091/mbc.E11-09-0781.

Pascual, R. *et al.* (2021) 'mRNA spindle localization and mitotic translational regulation by CPEB1 and CPEB4', *RNA*. RNA, 27(3), pp. 291–302. doi: 10.1261/rna.077552.120.

Pendleton, A. *et al.* (2003) 'Latrunculin B or ATP depletion induces cofilin-dependent translocation of actin into nuclei of mast cells', *The Journal of biological chemistry*. J Biol Chem, 278(16), pp. 14394–14400. doi: 10.1074/JBC.M206393200.

Perea-Resa, C. and Blower, M. D. (2018) 'Centromere Biology: Transcription Goes on Stage', *Molecular and Cellular Biology*. Mol Cell Biol, 38(18). doi: 10.1128/mcb.00263-18.

Peter, I. S. and Davidson, E. H. (2010) 'The endoderm gene regulatory network in sea urchin embryos up to mid-blastula stage', *Developmental biology*. Dev Biol, 340(2), pp. 188–199. doi: 10.1016/J.YDBIO.2009.10.037.

Petry, S. (2016) 'Mechanisms of Mitotic Spindle Assembly.', *Annual review of biochemistry*. Annu Rev Biochem, 85, pp. 659–683. doi: 10.1146/annurev-biochem-060815-014528.

Quignon, F. *et al.* (2007) 'Sustained mitotic block elicits DNA breaks: One-step alteration of ploidy and chromosome integrity in mammalian cells', *Oncogene*. *Oncogene*, 26(2), pp. 165–172. doi: 10.1038/sj.onc.1209787.

Raaijmakers, J. A. and Medema, R. H. (2014) 'Function and regulation of dynein in mitotic chromosome segregation', *Chromosoma*. *Chromosoma*, pp. 407–422. doi: 10.1007/s00412-014-0468-7.

Raff, J. W., Whitfield, W. G. and Glover, D. M. (1990) 'Two distinct mechanisms localise cyclin B transcripts in syncytial *Drosophila* embryos', *Development*, 110(4).

Randall, T. S. *et al.* (2017) 'A small-molecule activator of kinesin-1 drives remodeling of the microtubule network', *Proceedings of the National Academy of Sciences*, 114(52), pp. 13738 LP – 13743. doi: 10.1073/pnas.1715115115.

Remsburg, C., Testa, M. and Song, J. L. (2021) 'Rab35 regulates skeletogenesis and gastrulation by facilitating actin remodeling and vesicular trafficking', *Cells and Development*. Elsevier BV, 165, p. 203660. doi: 10.1016/j.cdev.2021.203660.

Revilla-I-Domingo, R., Oliveri, P. and Davidson, E. H. (2007) 'A missing link in the sea urchin embryo gene regulatory network: hesC and the double-negative specification of micromeres', *Proceedings of the National Academy of Sciences of the United States of America*. *Proc Natl Acad Sci U S A*, 104(30), pp. 12383–12388. doi: 10.1073/PNAS.0705324104.

Rieder, C. L. and Palazzo, R. E. (1992) 'Colcemid and the mitotic cycle', *Journal of Cell Science*. *J Cell Sci*, pp. 387–392. doi: 10.1242/jcs.102.3.387.



Sampilo, N. F. *et al.* (2018) 'Inhibition of microRNA suppression of *Dishevelled* results in Wnt pathway-associated developmental defects in sea urchin', *Development*, 145(23), p. dev167130. doi: 10.1242/dev.167130.

Scarborough, E. A. *et al.* (2021) 'Microtubules orchestrate local translation to enable cardiac growth', *Nature communications*. Nat Commun, 12(1). doi: 10.1038/S41467-021-21685-4.

Schneider, C. A., Rasband, W. S. and Eliceiri, K. W. (2012) 'NIH Image to ImageJ: 25 years of image analysis', *Nature Methods*, 9(7), pp. 671–675.

Schnorrer, F., Bohmann, K. and Nusslein-Volhard, C. (2000) 'The molecular motor dynein is involved in targeting swallow and bicoid RNA to the anterior pole of *Drosophila* oocytes', *Nature cell biology*. Nat Cell Biol, 2(4), pp. 185–190. doi: 10.1038/35008601.

Scrittori, L. *et al.* (2005) 'A small C-terminal sequence of Aurora B is responsible for localization and function', *Molecular biology of the cell*. Mol Biol Cell, 16(1), pp. 292–305. doi: 10.1091/MBC.E04-06-0447.

Sen, O. *et al.* (2021) 'Kinetochore life histories reveal an Aurora-B-dependent error correction mechanism in anaphase', *Developmental Cell*. Cell Press, 56(22), pp. 3082-3099.e5. doi: 10.1016/J.DEVCEL.2021.10.007.

Sepulveda, G. *et al.* (2018) 'Co-translational protein targeting facilitates centrosomal recruitment of PCNT during centrosome maturation in vertebrates', *eLife*. Elife, 7. doi: 10.7554/ELIFE.34959.

Sethi, A. J., Angerer, R. C. and Angerer, L. M. (2014) 'Multicolor labeling in developmental gene regulatory network analysis', *Methods in Molecular Biology (Clifton, N.J.)*, 1128, pp. 249–262. doi: 10.1007/978-1-62703-974-1\_17.

Sharp, J. A. *et al.* (2011) 'Functional analysis of the microtubule-interacting transcriptome'. doi: 10.1091/mbc.E11-07-0629.

Shestakova, E. A., Singer, R. H. and Condeelis, J. (2001) 'The physiological significance of beta -actin mRNA localization in determining cell polarity and directional motility', *Proceedings of the National Academy of Sciences of the United States of America*. Proc Natl Acad Sci U S A, 98(13), pp. 7045–7050. doi: 10.1073/PNAS.121146098.

Siefert, J. C., Clowdus, E. A. and Sansam, C. L. (2015) 'Cell cycle control in the early embryonic development of aquatic animal species', *Comparative Biochemistry and Physiology Part - C: Toxicology and Pharmacology*. Elsevier Inc., pp. 8–15. doi: 10.1016/j.cbpc.2015.10.003.

Song, J. L. *et al.* (2012) 'Select microRNAs are essential for early development in the sea urchin', *Developmental Biology*, 362(1), pp. 104–113. doi: 10.1016/j.ydbio.2011.11.015.

Song, J. L. and Wessel, G. M. (2007) 'Genes involved in the RNA interference pathway are differentially expressed during sea urchin development', *Developmental dynamics : an official publication of the American Association of Anatomists*. Dev Dyn, 236(11), pp. 3180–3190. doi: 10.1002/DVDY.21353.

Spellman, P. T. *et al.* (1998) 'Comprehensive identification of cell cycle-regulated genes of the yeast *Saccharomyces cerevisiae* by microarray hybridization', *Molecular biology of the cell*. Mol Biol Cell, 9(12), pp. 3273–3297. doi: 10.1091/MBC.9.12.3273.

Splinter, D. *et al.* (2010) 'Bicaudal D2, dynein, and kinesin-1 associate with nuclear pore complexes and regulate centrosome and nuclear positioning during mitotic entry', *PLoS biology*. PLoS Biol, 8(4). doi: 10.1371/JOURNAL.PBIO.1000350.

Stegmeier, F. *et al.* (2007) 'Anaphase initiation is regulated by antagonistic ubiquitination and deubiquitination activities', *Nature*, 446(7138), pp. 876–881. doi: 10.1038/nature05694.

Stepicheva, N. *et al.* (2015) 'microRNAs regulate  $\beta$ -catenin of the Wnt signaling pathway in early sea urchin development', *Developmental Biology*, 402(1), pp. 127–141. doi: 10.1016/j.ydbio.2015.01.008.

Stepicheva, N. A. and Song, J. L. (2015) 'microRNA-31 modulates skeletal patterning in the sea urchin embryo', *Development (Cambridge, England)*, 142(21), pp. 3769–3780. doi: 10.1242/dev.127969.

Straube, A. *et al.* (2006) 'Conventional kinesin mediates microtubule-microtubule interactions in vivo', *Molecular biology of the cell*. Mol Biol Cell, 17(2), pp. 907–916. doi: 10.1091/MBC.E05-06-0542.

Stüven, T., Hartmann, E. and Görlich, D. (2003) 'Exportin 6: A novel nuclear export receptor that is specific for profilin-actin complexes', *EMBO Journal*. EMBO J, 22(21), pp. 5928–5940. doi: 10.1093/emboj/cdg565.

Sun, R. *et al.* (2019) 'Mitosis-related phosphorylation of the eukaryotic translation suppressor 4E-BP1 and its interaction with eukaryotic translation initiation factor 4E (eIF4E)', *Journal of Biological Chemistry*. American Society for Biochemistry and Molecular Biology Inc., 294(31), pp. 11840–11852. doi: 10.1074/jbc.RA119.008512.

Suter, B. (2018) *RNA localization and transport, Biochimica et Biophysica Acta - Gene Regulatory Mechanisms*. Elsevier B.V. doi: 10.1016/j.bbagr.2018.08.004.

Takahashi, K., Ishii, K. and Yamashita, M. (2018) 'Staufen1, Kinesin1 and microtubule function in cyclin B1 mRNA transport to the animal polar cytoplasm of zebrafish oocytes', *Biochemical and Biophysical Research Communications*. Elsevier B.V., 503(4), pp. 2778–2783. doi: 10.1016/j.bbrc.2018.08.039.

Takizawa, P. A. *et al.* (1997) 'Actin-dependent localization of an RNA encoding a cell-fate determinant in the yeast', *Nature*. Nature, 389(6646), pp. 90–93. doi: 10.1038/38015.

Tanenbaum, M. E. *et al.* (2008) 'Dynein, Lis1 and CLIP-170 counteract Eg5-dependent centrosome separation during bipolar spindle assembly', *The EMBO journal*. EMBO J, 27(24), pp. 3235–3245. doi: 10.1038/EMBOJ.2008.242.

Tekotte, H. and Davis, I. (2002) 'Intracellular mRNA localization: Motors move messages', *Trends in Genetics*. Trends Genet, pp. 636–642. doi: 10.1016/S0168-9525(02)02819-6.

Uetake, Y. and Sluder, G. (2010) 'Prolonged prometaphase blocks daughter cell proliferation despite normal completion of mitosis', *Current Biology*. Curr Biol, 20(18), pp. 1666–1671. doi: 10.1016/j.cub.2010.08.018.

Untergasser, A. *et al.* (2012) 'Primer3--new capabilities and interfaces.', *Nucleic acids research*, 40(15), p. e115. doi: 10.1093/nar/gks596.

Vigneron, S. *et al.* (2018) 'Cyclin A-cdk1-Dependent Phosphorylation of Bora Is the Triggering Factor Promoting Mitotic Entry', *Developmental Cell*. Cell Press, 45(5), pp. 637-650.e7. doi: 10.1016/J.DEVCEL.2018.05.005.

Volpe, T. A. *et al.* (2002) 'Regulation of heterochromatic silencing and histone H3 lysine-9 methylation by RNAi', *Science*. Science, 297(5588), pp. 1833–1837. doi: 10.1126/science.1074973.

Waldron, A. and Yajima, M. (2020) 'Localized translation on the mitotic apparatus: A history and perspective', *Developmental biology*. Dev Biol, 468(1–2), pp. 55–58. doi: 10.1016/J.YDBIO.2020.09.010.

Welburn, J. P. I. *et al.* (2010) 'Aurora B phosphorylates spatially distinct targets to differentially regulate the kinetochore-microtubule interface', *Molecular cell*. Mol Cell, 38(3), pp. 383–392. doi: 10.1016/J.MOLCEL.2010.02.034.

Whitfield, M. L. *et al.* (2002) 'Identification of genes periodically expressed in the human cell cycle and their expression in tumors', *Molecular biology of the cell*. Mol Biol Cell, 13(6), pp. 1977–2000. doi: 10.1091/MBC.02-02-0030.

Winey, M. and Bloom, K. (2012) 'Mitotic spindle form and function', *Genetics*. Genetics, 190(4), pp. 1197–1224. doi: 10.1534/genetics.111.128710.

Xu, X., Brechbiel, J. L. and Gavis, E. R. (2013) 'Dynein-dependent transport of nanos RNA in Drosophila sensory neurons requires Rumpelstiltskin and the germ plasm organizer Oskar', *The Journal of neuroscience : the official journal of the Society for Neuroscience*. J Neurosci, 33(37), pp. 14791–14800. doi: 10.1523/JNEUROSCI.5864-12.2013.

Yajima, M. and Wessel, G. M. (2015) 'Essential elements for translation: The germline factor vasa functions broadly in somatic cells', *Development (Cambridge)*. Company of Biologists Ltd, 142(11), pp. 1960–1970. doi: 10.1242/dev.118448.

Yoon, Y. J. *et al.* (2016) 'Glutamate-induced RNA localization and translation in neurons.', *Proceedings of the National Academy of Sciences of the United States of America*. Proc Natl Acad Sci U S A, 113(44), pp. E6877--E6886. doi: 10.1073/pnas.1614267113.

Zeng, C. (2000) 'NuMA: a nuclear protein involved in mitotic centrosome function', *Microscopy research and technique*. Microsc Res Tech, 49(5), pp. 467–477. doi: 10.1002/(sici)1097-0029(20000601)49:5<467::aid-jemt9>3.0.co;2-v.

Figures

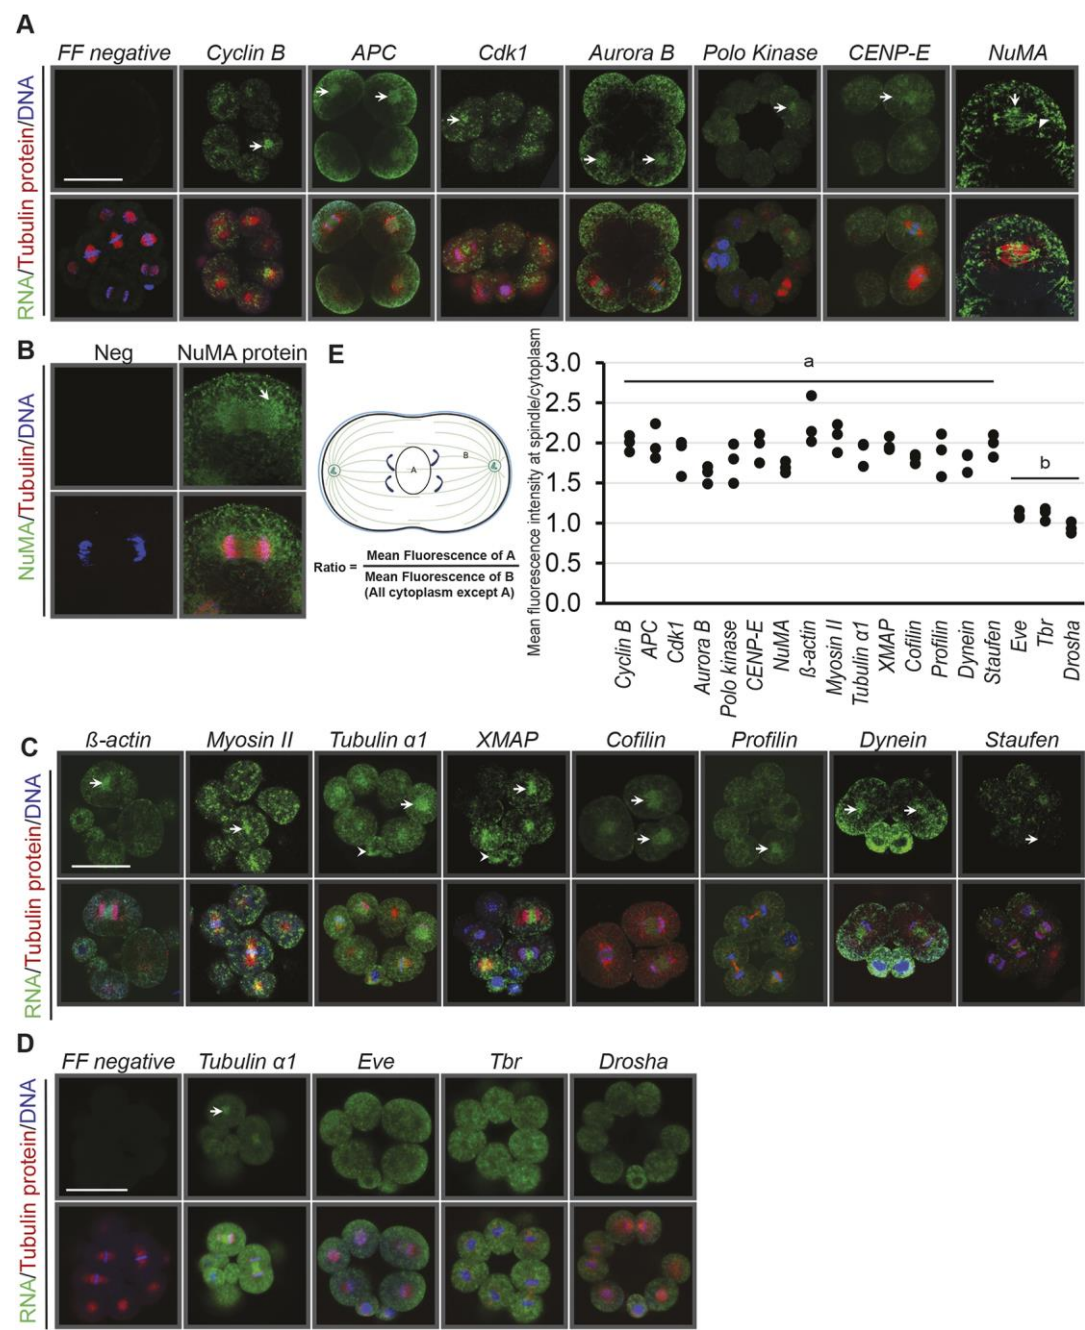



**Fig. 1. RNA transcripts that encode proteins that regulate mitosis localize to the mitotic spindle in developing embryos.**

(A) RNA transcripts that encode proteins that regulate mitosis localize to the mitotic spindle. Embryos at the 16-32 cell stage were subjected to FISH, followed by immunolabeling with  $\beta$ -tubulin antibody, then counterstained with DAPI to detect DNA. Arrows indicate areas of RNA localization. Scale bar = 50  $\mu$ m. (B) NuMA and  $\alpha$ -tubulin protein localize to the mitotic spindle. Scale bar = 10  $\mu$ m. (C) RNA transcripts that encode cytoskeletal proteins, motor proteins or transport RNA localize to the mitotic spindle. Embryos at the 16-32 cell stage were subjected to FISH, followed by immunolabeling with  $\beta$ -tubulin antibody, then counterstained with DAPI to detect DNA. Arrows indicate areas of RNA localization. Firefly (FF) is used as a negative control. Scale bar = 50  $\mu$ m. The ratio of mean fluorescence intensity of RNA at the spindle to the cytoplasm was measured in physiologic embryos. (D) RNA transcripts that encode proteins that are not known to regulate mitosis and are expressed at the 16-32 cell stage do not localize to the mitotic spindle. Embryos were subjected to FISH using RNA probes, then immunolabeled with  $\beta$ -tubulin antibody, and counterstained with DAPI to detect DNA. *Tubulin  $\alpha$ 1* transcript is used as a positive control. Scale bar = 50  $\mu$ m. (E) A schematic of measured areas is shown, where area A represents a spindle region and area B represents the rest of the cytoplasmic region except for region A. The ratios of areas A and B represents the mean fluorescence intensity of RNA at the spindle to the cytoplasm. The ratio of mean fluorescence intensity of RNA at the spindle to the cytoplasm was measured in physiologic embryos for 3 blastomeres in anaphase. There is a significant increase in this ratio for *Cyclin B*, *APC*, *Cdk*, *Aurora B*, *Polo kinase*, *CENP-E* and *NuMA* compared to *Eve*, *Drosha* and *Tbr* using a one-way ANOVA with a post-hoc Tukey-Kramer test. Groups indicated with 'a' are significantly different from those with 'b'.



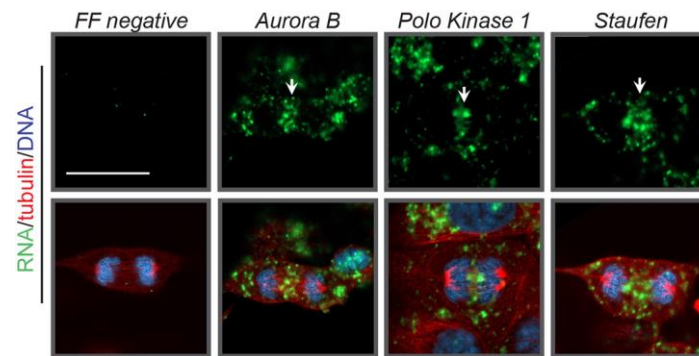

**Fig. 2. Localization of RNA transcripts is evolutionarily conserved in mammalian cells.** LLC-PK1 cells were subjected to FISH, followed by immunolabeling for  $\alpha$ -tubulin then counterstained with DAPI. Arrows indicate RNA localization at the mitotic spindle, arrowheads indicate RNA at the perinuclear region. Dashed line indicates cell boundary. FF is used as a negative control. Scale bar = 10  $\mu$ m.

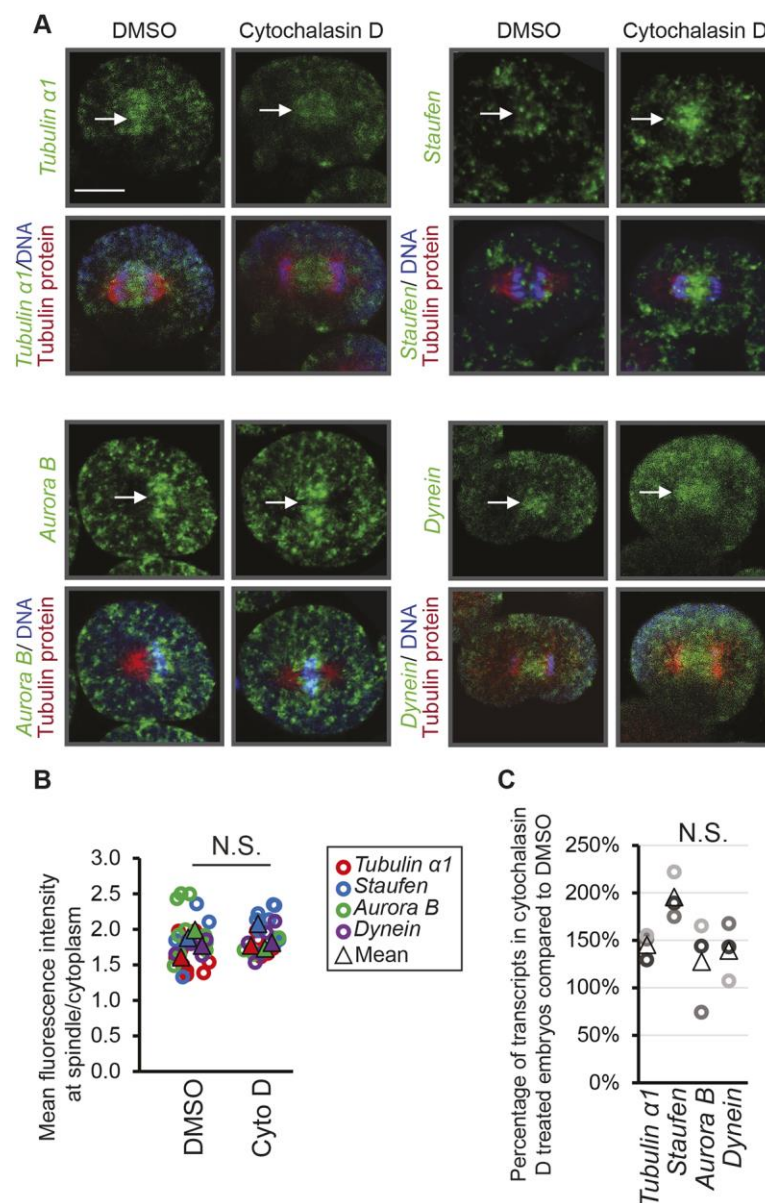

**Fig. 3. Disruption of actin polymerization with cytochalasin does not change RNA localization to the mitotic spindle.** (A) RNA localization to the mitotic spindle is not affected with cytochalasin D treatment. Images are of single blastomeres of embryos at the 16-32 cell stage that were subjected to FISH with RNA probes that encode proteins known to regulate mitosis, then immunolabeled with  $\beta$ -tubulin antibody, and counterstained with DAPI. Arrows

indicate areas of RNA localization. Scale bar = 10  $\mu$ m. (B) The ratio of mean fluorescence intensity of the RNA at the mitotic spindle to the cytoplasm is unchanged in embryos treated with cytochalasin D compared to control embryos. A Student's t-test was performed using the means for each transcript. NS=not significant. Circles represent individual measurements, while triangles represent the means for each transcript. *Tubulin  $\alpha$ 1* is in red, *Aurora B* is in green, *Staufen* is in blue, *Dynein* is in purple. (C) qPCR results indicate no difference in transcript level between control embryos and embryos treated with cytochalasin D using a Student's t-test. 3 biological replicates.

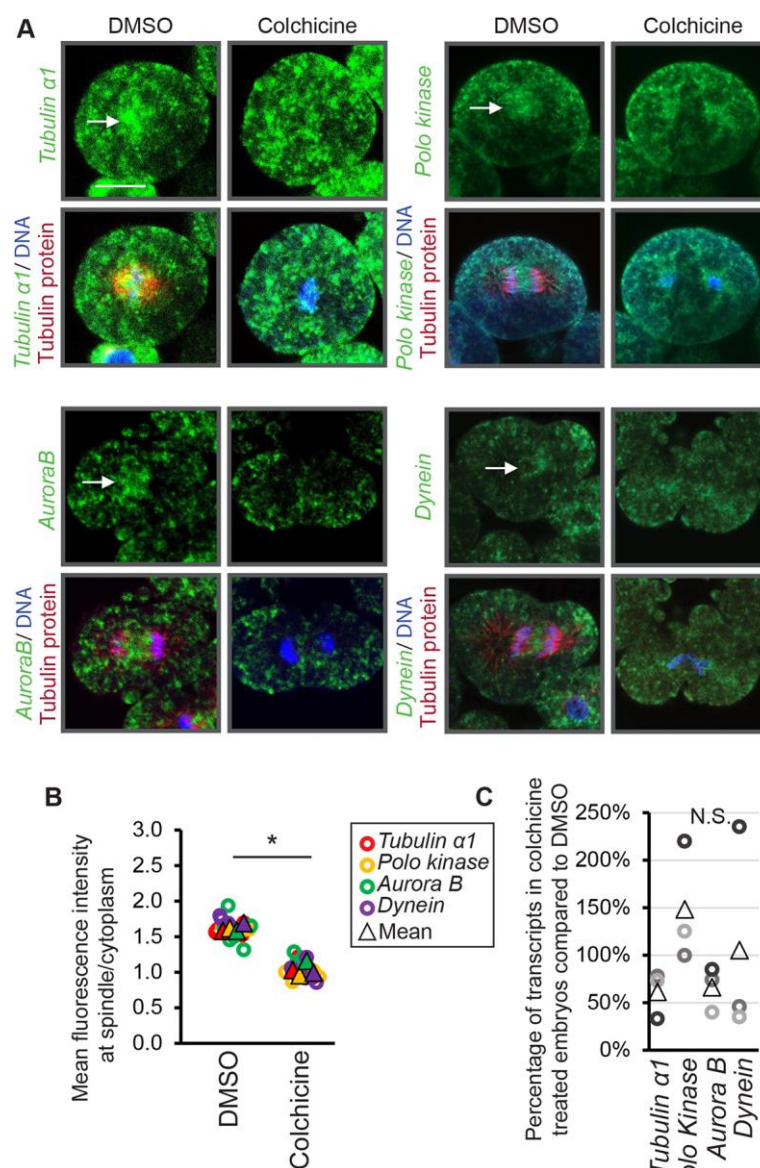

**Fig. 4. Disruption of microtubule polymerization with colchicine abrogates RNA localization to the mitotic spindle.** (A) RNA is no longer localized to the mitotic spindle after embryos are treated with colchicine. Images are of single blastomeres of embryos at the 16-32 cell stage that were subjected to FISH with RNA probes of genes known to regulate mitosis, then immunolabeled with  $\beta$ -tubulin antibody, and counterstained with DAPI. Arrows indicate areas of RNA

localization. Scale bar = 10  $\mu$ m. (B) The ratio of mean fluorescence intensity of the RNA at the mitotic spindle to the cytoplasm is significantly lower in embryos treated with colchicine compared to control embryos. A Student's t-test was performed using the means for each transcript. \*  $p < 0.01$ . Circles represent individual measurements, while triangles represent the means for each transcript. *Tubulin  $\alpha$ 1* is in red, *Polo Kinase* is in yellow, *Aurora B* is in green, *Dynein* is in purple. (C) qPCR results indicate no difference using a Student's t-test in transcript level between control embryos and embryos treated with colchicine D. 3 biological replicates.

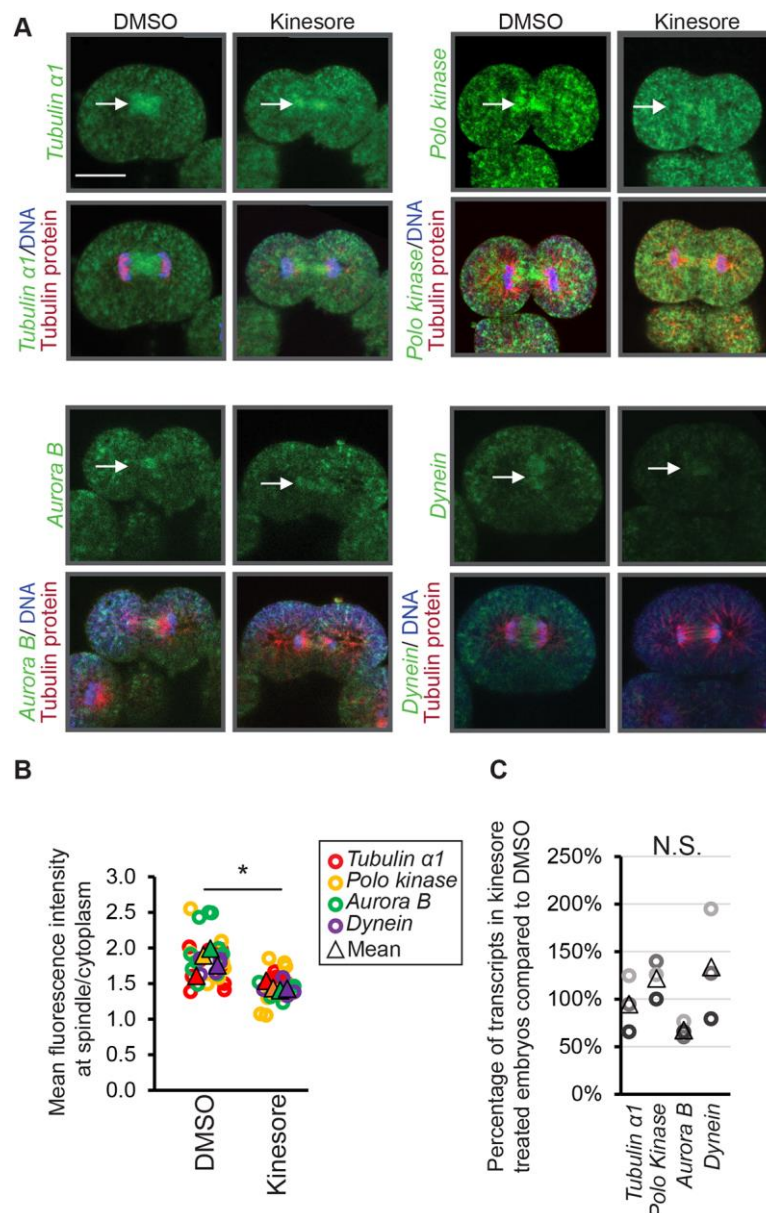

**Fig. 5. Kinesore treatment diminishes RNA localization to the mitotic spindle.** (A) RNA is less localized to the mitotic spindle after embryos are treated with kinesore. Images are of single blastomeres of embryos at the 16-32 cell stage that were subjected to FISH with RNA probes of genes known to regulate mitosis, immunolabeled with  $\beta$ -tubulin antibody, and counterstained with DAPI. Arrows indicate areas of RNA localization. Scale bar = 10  $\mu$ m. (B)

The ratio of mean fluorescence intensity of the RNA at the mitotic spindle to the cytoplasm is significantly lower in embryos treated with kinesore compared to control embryos. A Student's t-test was performed using the means for each transcript. \*  $p < 0.01$ . Circles represent individual measurements, while triangles represent the means for each transcript. *Tubulin  $\alpha 1$*  is in red, *Polo Kinase* is in yellow, *Aurora B* is in green, *Dynein* is in purple. (C) qPCR results indicate no difference using a Student's t-test in transcript level between control embryos and embryos treated with kinesore. 3 biological replicates.



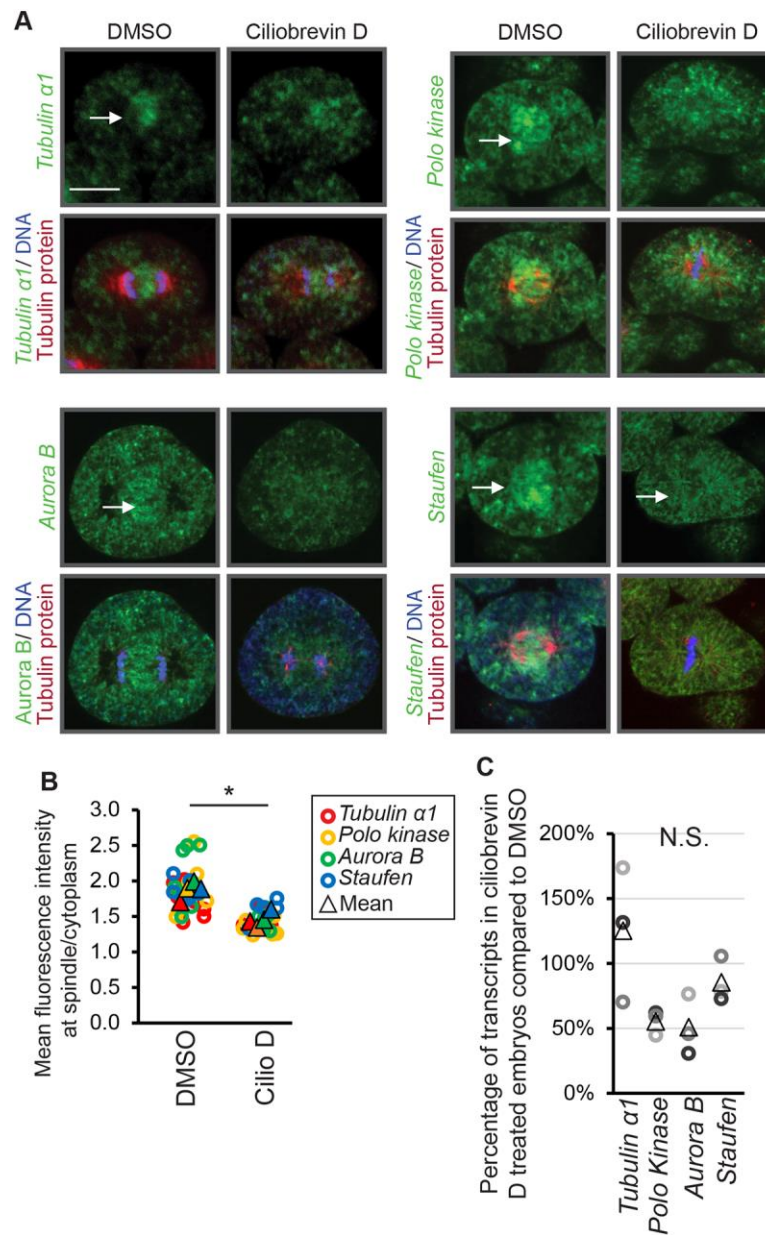

**Fig. 6. Dynein inhibition alters RNA localization to the mitotic spindle.** (A) RNA localization to the mitotic spindle is altered after embryos are treated with ciliobrevin D. Images are of single blastomeres of embryos at the 16-32 cell stage that were subjected to FISH with RNA probes of genes known to regulate mitosis, immunolabeled with  $\beta$ -tubulin antibody, then counterstained with DAPI.



Arrows indicate areas of RNA localization. Scale bar = 10  $\mu$ m. (B) The ratio of mean fluorescence intensity of the RNA at the mitotic spindle to the cytoplasm is significantly lower in embryos treated with ciliobrevin D compared to control embryos. A Student's t-test was performed using the means for each transcript. \*  $p < 0.01$ . Circles represent individual measurements, while triangles represent the means for each transcript. *Tubulin  $\alpha 1$*  is in red, *Polo Kinase* is in yellow, *Aurora B* is in green, *Staufen* is in blue. (C) qPCR results indicate no difference in transcript level using a Student's t-test between control embryos and embryos treated with ciliobrevin D. 3 biological replicates.

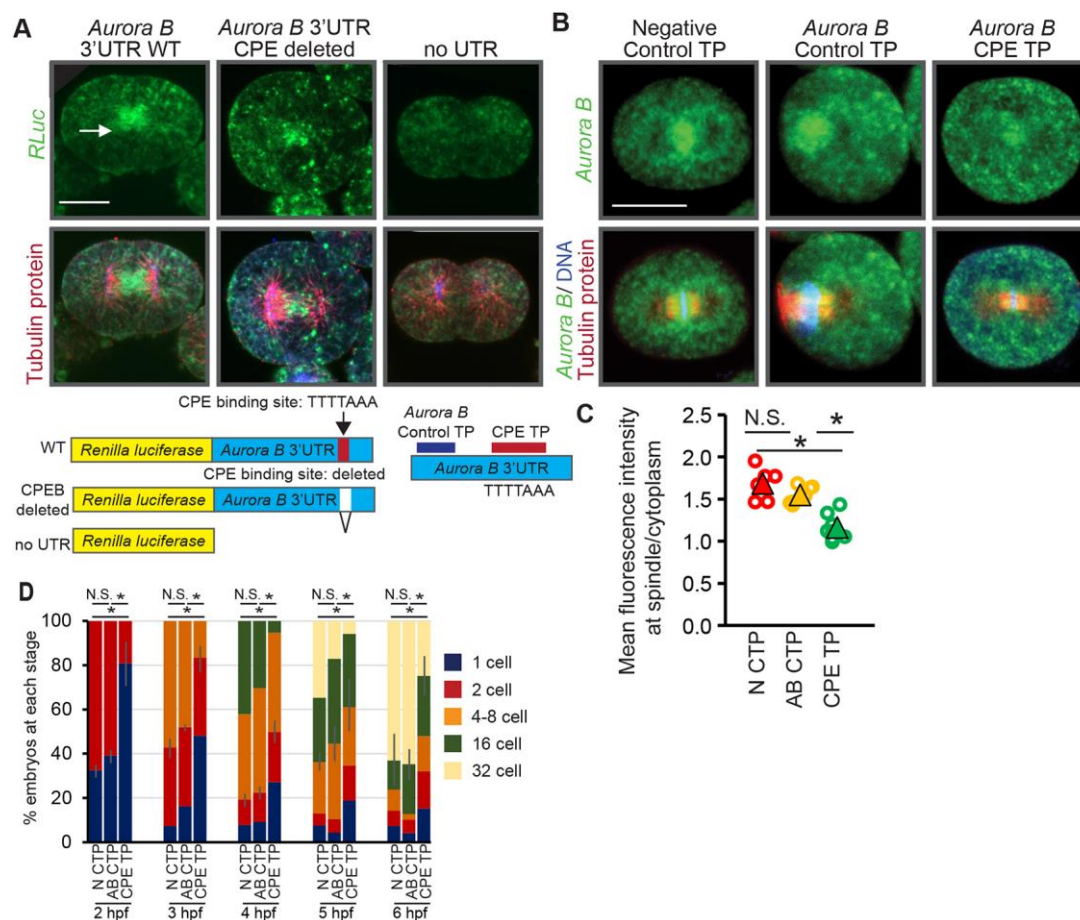

**Fig. 7. The 3'UTR of *Aurora B*, and specifically the CPE sequence, is necessary for localization of RNA to the mitotic spindle.** (A) Embryos were injected with RNA constructs containing *RLuc-Aurora B* 3'UTR WT RNA, *RLuc-Aurora B* 3'UTR CPE deleted, or *RLuc-no UTR*. Exogenously injected *RLuc-Aurora B* 3'UTR WT RNA is localized at the mitotic spindle, while *RLuc-Aurora B* 3'UTR CPE deleted is no longer localized, similar to *RLuc-no UTR* RNA. Images are of single blastomeres of embryos collected at the 16-32 cell stage then subjected to FISH with the *RLuc* probe, immunolabeled with  $\beta$ -tubulin antibody, then counterstained with DAPI. Arrows indicate areas of RNA localization. Scale bar = 10 $\mu$ m. (B) Blocking the CPE within the 3'UTR of *Aurora B* results in less localization of endogenous *Aurora B* to the mitotic spindle

compared to control embryos. Images are of single blastomeres of embryos collected at the 16-32 cell stage then subjected to FISH *Aurora B* RNA probe, immunolabeled with  $\beta$ -tubulin antibody, then counterstained with DAPI. Arrows indicate areas of RNA localization. Scale bar = 10  $\mu$ m. (C) The ratio of mean fluorescence intensity of the RNA at the mitotic spindle to the cytoplasm is significantly lower in embryos in which the CPE is blocked compared to control embryos. \*  $p < 0.005$  using a one-way ANOVA, with a post-hoc Tukey-Kramer test. Circles represent individual measurements, while triangles represent the means. (D) Embryos in which the CPE is blocked have significant developmental delay compared to control embryos. \* $p < 0.001$  using Cochran-Mantel-Haenszel test. 210 negative control embryos, 255 *Aurora B* 3'UTR control embryos, 217 *Aurora B* CPE TP embryos, 3 biological replicates. Error bars indicate SEM.

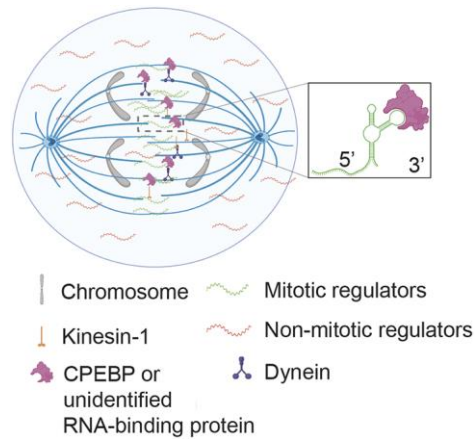

**Fig. 8. Model of RNA transcript localization to the mitotic spindle.** RNA transcripts that encode proteins that regulate mitosis are localized to the mitotic spindle. Microtubule motors kinesin-1 and dynein are involved in the transport of these RNA transcripts. Based on our results as well as previous research, we hypothesize that local translation of these transcripts (*cyclin B*, *Aurora B*) are essential for proper development (Groisman *et al.*, 2000). The 3'UTR of the RNAs contain sequences responsible for binding of RNA-binding proteins, such as CPEB, which may be responsible for localization of the RNA to the mitotic spindle. RNA localization allows local translation at the spindles is a regulatory mechanism to ensure rapid cell divisions that occur during the early cleavage stage.

**Table 1: Primers used in this study**

| Gene name                           | Forward primer (5' to 3') | Reverse primer (5' to 3', Sp6 promoter sequence in red) | SPU number/ECB identifier        |
|-------------------------------------|---------------------------|---------------------------------------------------------|----------------------------------|
| <b>In situ probe synthesis</b>      |                           |                                                         |                                  |
| <i>APC</i>                          | ACTCTGTTGTGGGGCA<br>TCTC  | ATTTAGGTGACACTATAGCTGTG<br>GCAGCAGTCTGTTTG              | SPU_021077/ECB-GENE<br>-23149559 |
| <i><math>\beta</math>-actin</i>     | CGGATCGGGTATGTGT<br>AAGG  | ATTTAGGTGACACTATAGTCTTC<br>ATGGAGGGTGGAGTC              | SPU_015278/ECB-GENE<br>-23058994 |
| <i>Cdk1</i>                         | GTGTACAAGGGCAAGC<br>ACAA  | ATTTAGGTGACACTATAGCTCCT<br>GATGGGCTGGAGAC               | SPU_002210/ECB-GENE<br>-23040742 |
| <i>CENP-E</i>                       | GAGGTTAGAAGCCGCT<br>CTCT  | ATTTAGGTGACACTATAGCGGAG<br>AGAGAAGACGGAGAC              | SPU_017809/ECB-GENE<br>-23144704 |
| <i>Cyclin B</i>                     | GGAGGTAGACCCCATC<br>GAAT  | ATTTAGGTGACACTATAGTGCTG<br>CGGTACTTTGTCTTG              | SPU_026576/ECB-GENE<br>-23192845 |
| <i>Dynein</i>                       | CTTACGAGCCCTGAAG<br>AACG  | ATTTAGGTGACACTATAGCATGG<br>GGAAGTCACTGTGTG              | SPU_003217/ECB-GENE<br>-23151110 |
| <i>Staufen</i>                      | GCCCCCTCTACGGAGG<br>TTAC  | ATTTAGGTGACACTATAGTCAGT<br>CACAGCGAATTCAGG              | SPU_010068/ECB-GENE<br>-23172924 |
| <i>XMAP215</i>                      | AAGGAGCCTGAGAACA<br>CGAA  | ATTTAGGTGACACTATAGCAACT<br>CAGCCAGACCCTCTC              | SPU_013895/ECB-GENE<br>-23094529 |
| <i>Polo Kinase 1</i>                | CCTCACATCGACATCC<br>TCCT  | ATTTAGGTGACACTATAGCCATG<br>TTGTTGGCGTACTTG              | SPU_009559/ECB-GENE<br>-23120647 |
| <i>Tubulin <math>\alpha</math>1</i> | CTACACCGTCGGAAAG<br>GAGC  | ATTTAGGTGACACTATAGTCTCG<br>AGAGCAGCCAAATCC              | SPU_012679/ECB-GENE<br>-23130001 |
| <i>Profilin</i>                     | CTAGTTCGGCCTTGAT<br>CAGC  | ATTTAGGTGACACTATAGCATCC<br>AACCTCAAGCCAAAT              | SPU_020197/ECB-GENE<br>-23176848 |
| <i>MyosinII</i>                     | TTGACAGTTTGTTGG<br>TGGA   | ATTTAGGTGACACTATAGCACCA<br>TCGACCTCAGGTTT               | SPU_001613/ECB-GENE<br>-23160185 |
| <i>Cofilin</i>                      | TGCCGAAATCAAGTAT<br>GTCCG | ATTTAGGTGACACTATAGTCGCT<br>TAATTGTTTTGCACG              | SPU_006172/ECB-GENE<br>-23147711 |

|                                      |                               |                                           |                                  |
|--------------------------------------|-------------------------------|-------------------------------------------|----------------------------------|
| <i>NuMA</i>                          | GAGCTGGAAGTGGAGA<br>AGGT      | ATTAGGTGACACTATAGCTTGC<br>CTCCCTCTCTTCCAA | SPU_023686/ECB-GENE<br>-23046327 |
| <i>Aurora B in situ</i>              | TCGCCATTGCAACAT<br>TTTA       | ATTAGGTGACACTATAGATGCG<br>TCCCTCAATCATCTC | SPU_027666/ECB-GENE<br>-23185392 |
| <b>3'UTR cloning</b>                 |                               |                                           |                                  |
| <i>Aurora B 3'UTR</i>                | CTCGAGAGCCCCTCCC<br>CAAATAATC | GCGGCCGCCGCGCATGTATGTAG<br>CTCTG          | SPU_027666/ECB-GENE<br>-23185392 |
| <b>qPCR</b>                          |                               |                                           |                                  |
| <i>Tubulin <math>\alpha 1</math></i> | AGACAAGACCATCGGA<br>GGTG      | ACCTCATCGACTACGGTTGG                      | SPU_012679/ECB-GENE<br>-23130001 |
| <i>Staufen</i>                       | GAAGGATGCCAAGAAG<br>CAAG      | TCCAGTCTTGAGGGCTGACT                      | SPU_010068/ECB-GENE<br>-23172924 |
| <i>Dynein</i>                        | TGTCACCAGCATGTTC<br>ACCT      | TTCGTCAGAGCATTGACAGC                      | SPU_003217/ECB-GENE<br>-23151110 |
| <i>Ubiquitin</i>                     | CACAGGCAAGACCATC<br>ACAC      | GAGAGAGTGCGACCATCCTC                      | SPU_021496/<br>ECB-GENE-23195219 |
| <i>Polo Kinase 1</i>                 | TCAGGCAGAAGACCAC<br>TCCT      | CTGGTAGACCTTTGGTGGCTTGC                   | SPU_009559/ECB-GENE<br>-23120647 |
| <i>Aurora B</i>                      | GCACGATGACAAACAA<br>ATGG      | GGCCACGATGTACTTGGTCT                      | SPU_027666/ECB-GENE<br>-23185392 |

**Figure S1**

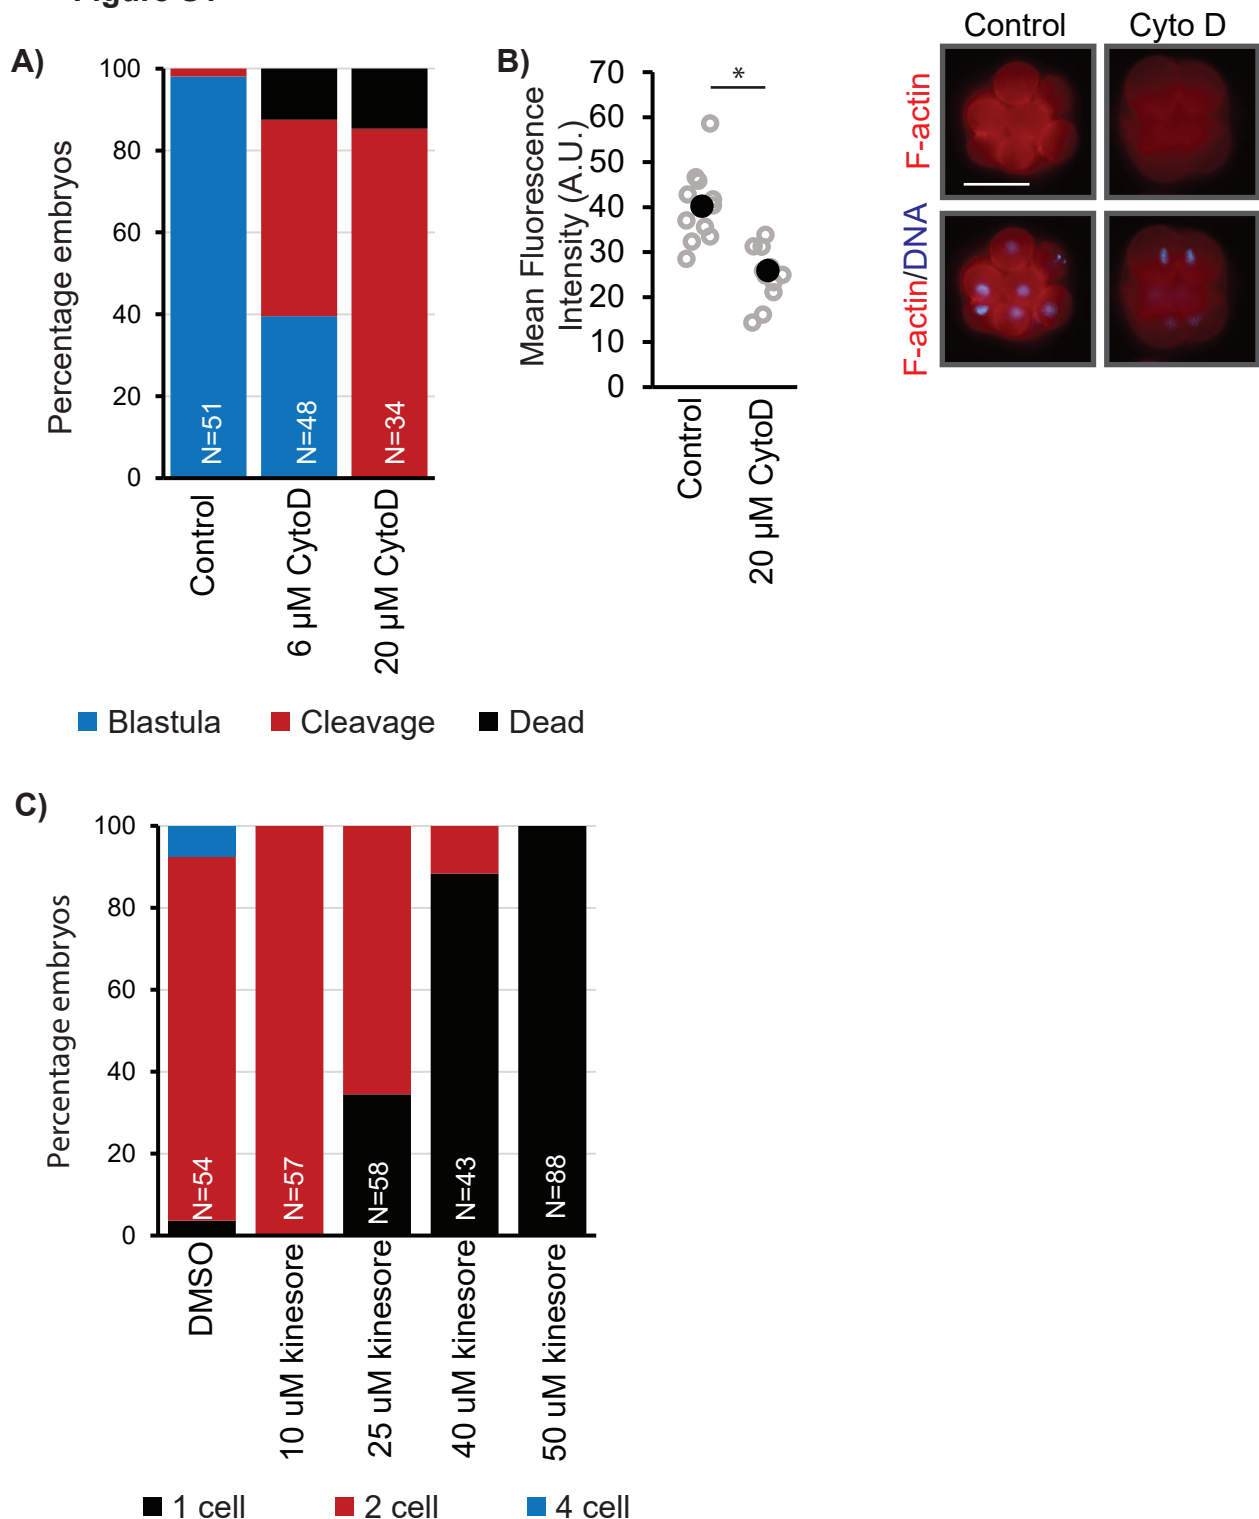

**Fig. S1.** Treatment with cytochalasin D and kinesore result in cleavage stage arrest. (A): Embryos treated with cytochalasin D exhibit cleavage stage arrest. Embryos were treated with the indicated dose of cytochalasin D at early cleavage stage and assessed at 24 hpf to determine survival. (B) F-actin is decreased in embryos treated with cytochalasin D. Embryos were treated with cytochalasin D, then F-actin was labeled with phalloidin, and fluorescence intensity of embryos was measured using ImageJ. \*p<0.05 using Student's t-test. (C) Embryos treated with kinesore exhibit cleavage stage arrest. Embryos were treated with the listed dose of kinesore and assessed at 2 hpf to determine survival.

**Figure S2**

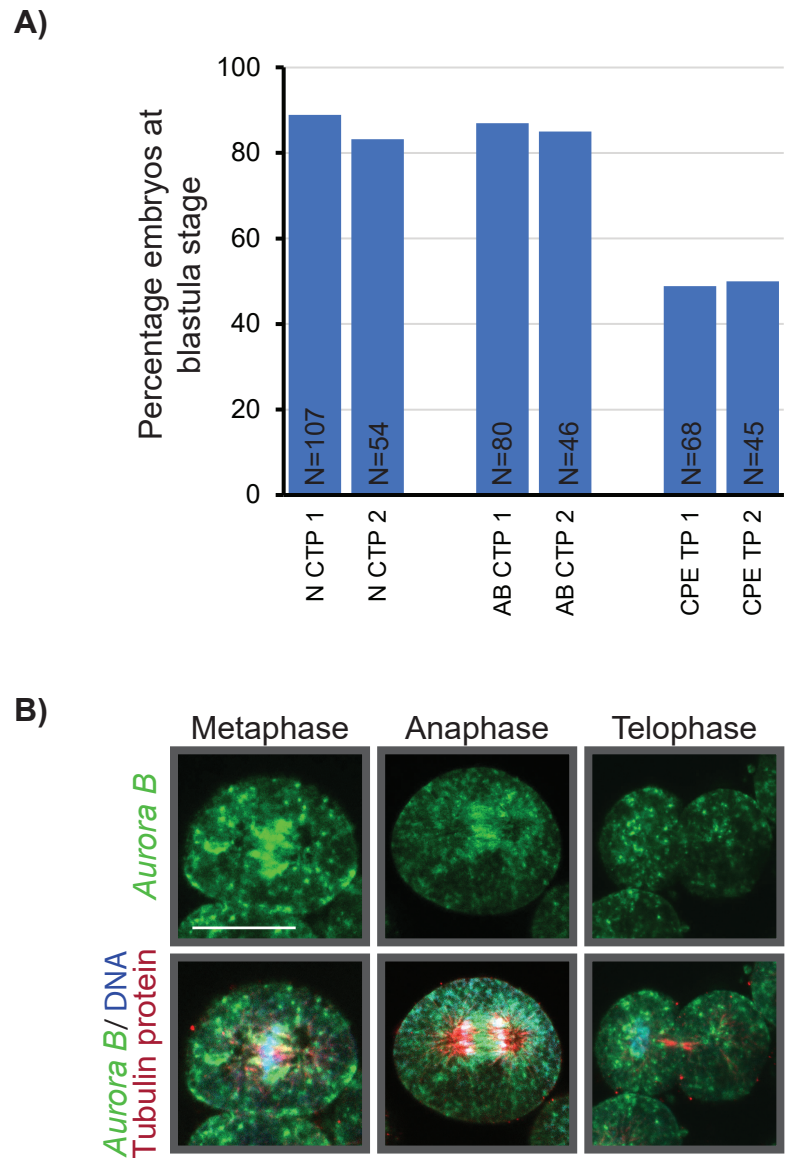

**Fig. S2.** (A) Embryos injected with Aurora B CPE TP exhibit decreased survival to blastula stage. Embryos were injected then allowed to develop to 24 hpf. 2 biological replicates. (B) Aurora B RNA transcript localization varies throughout the cell cycle. Images are of single blastomeres of embryos collected at the 16-32 cell stage then subjected to FISH with the *Aurora B* probe, immunolabeled with  $\beta$ -tubulin antibody, then counterstained with DAPI. Scale bar = 10 $\mu$ m.



**Figure S3**

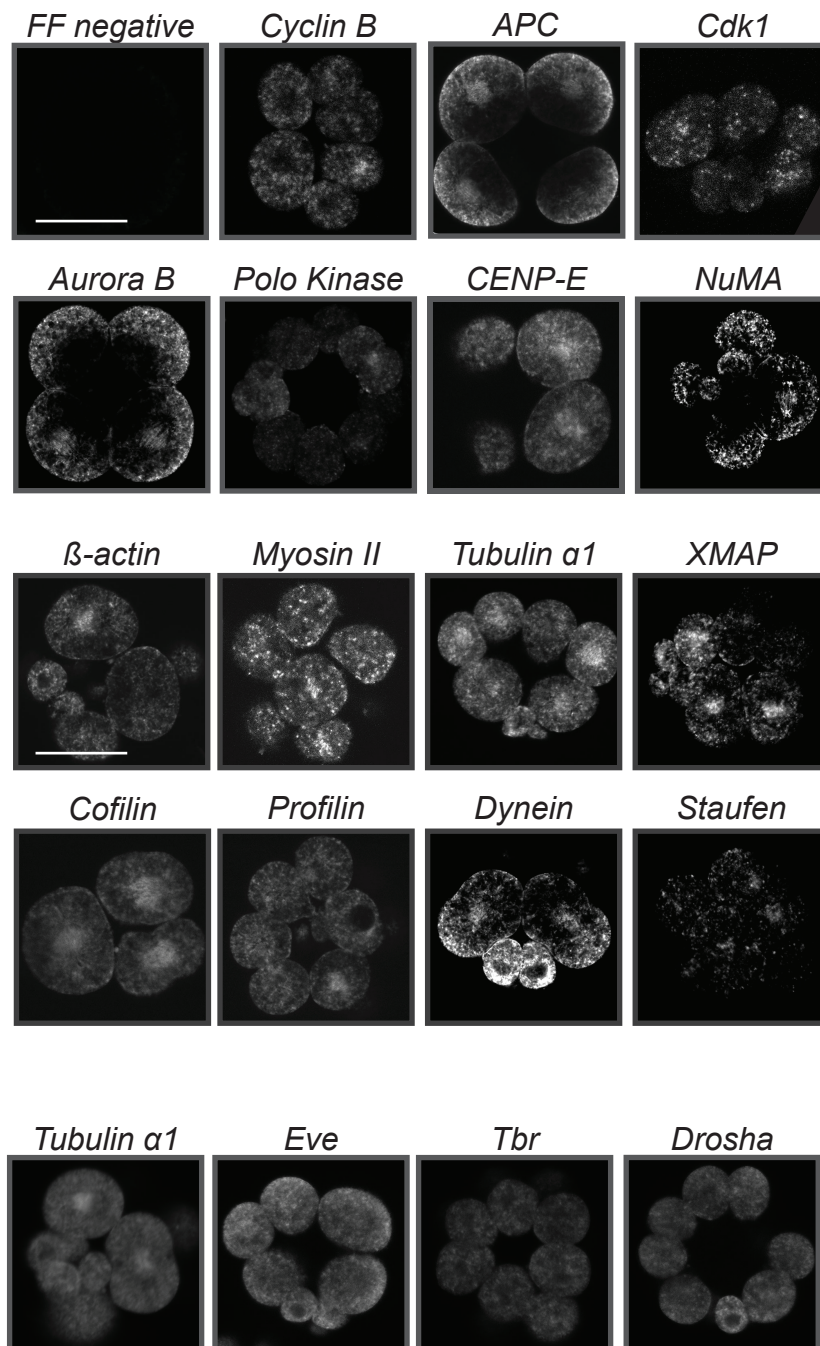

**Fig. S3.** Grey-scale look-up tables of FISH images of physiologic embryos from Figure 1.
